# Supplementary material
Source: PubMed Central journal article supplement (PMC4764151)
Supplement: supp_db15-1313_DB151313SupplementaryData.pdf [file supp_db15-1313_DB151313SupplementaryData.pdf]

SUPPLEMENTARY DATA

**Genome-wide Association Studies Identify Genetic Loci Associated with  
Albuminuria in Diabetes**

SUPPLEMENTAL MATERIALS

## SUPPLEMENTARY DATA

### Table of Contents

|                                                                                                                                                                             |           |
|-----------------------------------------------------------------------------------------------------------------------------------------------------------------------------|-----------|
| <b>SUPPLEMENTARY FIGURE 1: QQ PLOTS FOR ALL GWAS META-ANALYSES .....</b>                                                                                                    | <b>3</b>  |
| <b>SUPPLEMENTARY FIGURE 2: MANHATTAN PLOTS FOR ALL GWAS META-ANALYSES .....</b>                                                                                             | <b>4</b>  |
| <b>SUPPLEMENTARY FIGURE 3: REGIONAL ASSOCIATION PLOTS.....</b>                                                                                                              | <b>6</b>  |
| <b>SUPPLEMENTARY FIGURE 4: EVALUATION OF GLOMERULOSCLEROSIS IN RAB38 KO, CONGENIC AND TRANSGENIC RATS.....</b>                                                              | <b>17</b> |
| <b>SUPPLEMENTARY TABLE 1: CHARACTERISTICS OF THE STUDY POPULATIONS .....</b>                                                                                                | <b>18</b> |
| <b>SUPPLEMENTARY TABLE 2: INFORMATION ABOUT STUDY DESIGN AND UACR MEASUREMENT .....</b>                                                                                     | <b>20</b> |
| <b>SUPPLEMENTARY TABLE 3: STUDY-SPECIFIC INFORMATION ABOUT GENOTYPING, IMPUTATION AND DATA MANAGEMENT AND ANALYSIS.....</b>                                                 | <b>31</b> |
| <b>SUPPLEMENTARY TABLE 4: SNPS ASSOCIATED WITH UACR AMONG ALL INDIVIDUALS WITH A P-VALUE OF &lt;1E-05.....</b>                                                              | <b>35</b> |
| <b>SUPPLEMENTARY TABLE 5: SNPS ASSOCIATED WITH MA AMONG ALL INDIVIDUALS WITH A P-VALUE OF &lt;1E-05.....</b>                                                                | <b>38</b> |
| <b>SUPPLEMENTARY TABLE 6: SNPS ASSOCIATED WITH UACR AMONG INDIVIDUALS WITHOUT DIABETES WITH A P-VALUE OF &lt;1E-05. ....</b>                                                | <b>40</b> |
| <b>SUPPLEMENTARY TABLE 7: SNPS ASSOCIATED WITH UACR AMONG INDIVIDUALS WITH DIABETES WITH A P-VALUE OF &lt;1E-05.....</b>                                                    | <b>41</b> |
| <b>SUPPLEMENTARY TABLE 8: DISCOVERY, REPLICATION AND COMBINED ESTIMATES FOR ALL INDEX SNPS ASSOCIATED WITH UACR IN DIABETES IN THE DISCOVERY SAMPLE AT P&lt;1E-05 .....</b> | <b>42</b> |
| <b>SUPPLEMENTARY TABLE 9: ASSOCIATION RESULTS FOR THE INDEX SNPS NEAR <i>RAB38/CTSC</i> AND IN <i>HS6ST1</i> IN THE DCCT/EDIC STUDY .....</b>                               | <b>43</b> |

## SUPPLEMENTARY DATA

### Supplementary Figure 1: QQ plots for all GWAS meta-analyses

Quantile-quantile (QQ) plots of the GWAS meta-analysis results for (a) the urinary albumin-to-creatinine ratio (UACR) in the overall sample, (b) UACR among those with diabetes (c) UACR among those without diabetes, and (d) microalbuminuria (MA) in the overall sample. The observed p-values are plotted on the y-axis against their expected distribution under the null hypothesis on the x-axis.

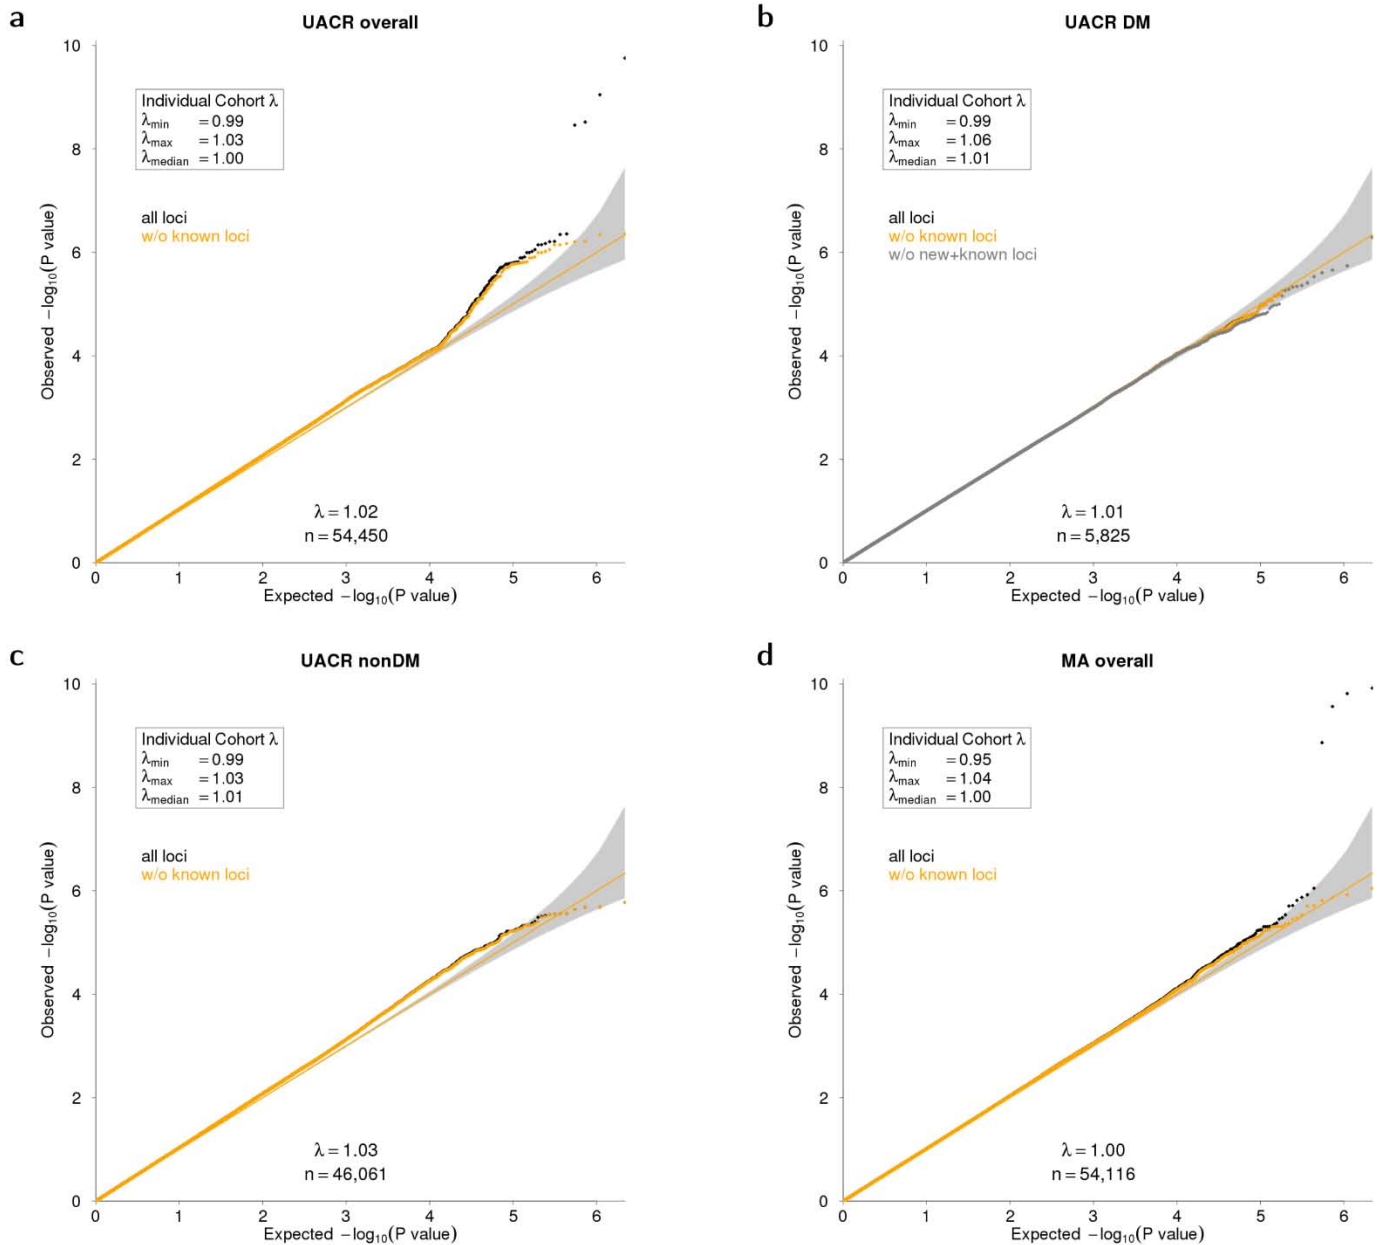

Results for all SNPs are shown in black, and results after removal of loci previously known to contain trait-associated variants are shown in yellow. Gray bands represent 95% confidence intervals.  $\lambda$ : lambda, genomic control parameter; n: sample size.

## SUPPLEMENTARY DATA

### **Supplementary Figure 2: Manhattan plots for all GWAS meta-analyses**

Manhattan plots of the GWAS meta-analysis results for **(a)** UACR in the overall sample, **(b)** UACR among those with diabetes, **(c)** UACR among those without diabetes, and **(d)** microalbuminuria in the overall sample. SNPs are plotted on the x-axis according to their position on each chromosome with the  $-\log_{10}(\text{p-value})$  on the y-axis. The upper solid horizontal line indicates the threshold for genome-wide significance,  $5 \times 10^{-8}$ . The lower solid horizontal line for UACR among those with diabetes **(b)** represents the threshold of  $1 \times 10^{-5}$  applied to select SNPs for replication. Genomic loci previously known to contain trait-associated variants are colored in light blue, new findings in dark blue.

SUPPLEMENTARY DATA

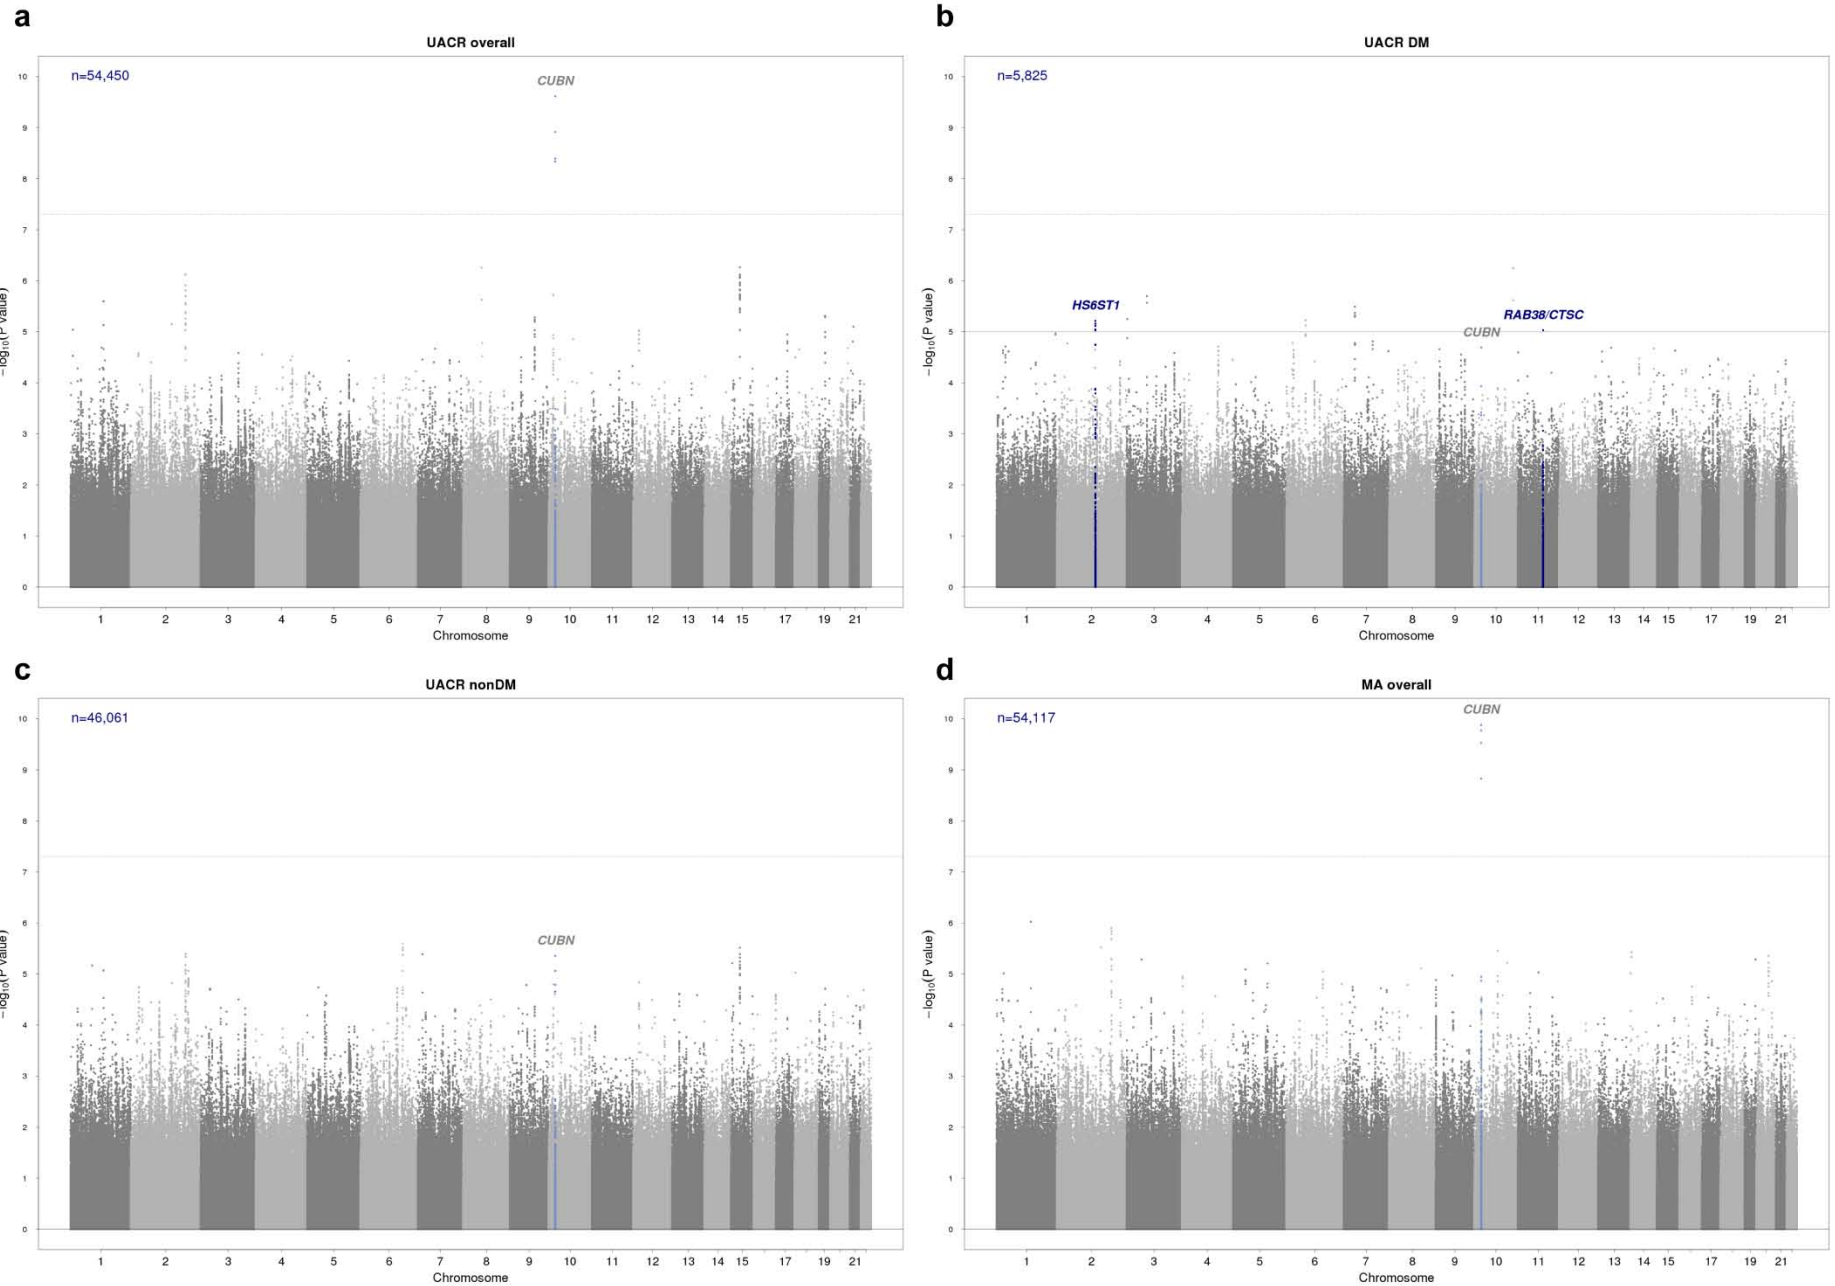

## SUPPLEMENTARY DATA

### **Supplementary Figure 3: Regional association plots**

Regional association plots are shown for all loci that contained at least one index SNP associated with the trait at  $p < 10^{-5}$  after correction for genomic control. Correlation with the index SNP is estimated based on the HapMap r22 CEU samples. Plots were generated using the stand-alone version of LocusZoom (Pruim RJ *et al.*, Bioinformatics 2010). When association in a genomic region was observed with more than one trait, the regional association plot of the trait with the lowest p-value is shown. Genetic positions refer to NCBI build 36/hg18 coordinates.

SUPPLEMENTARY DATA

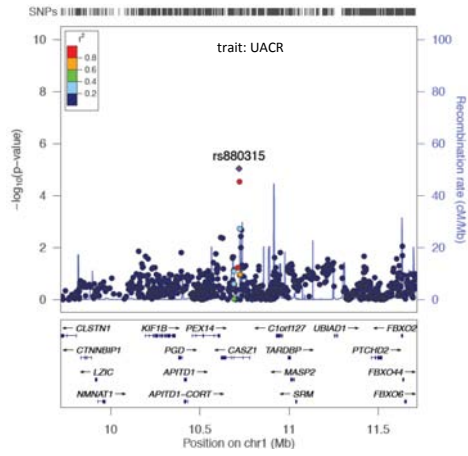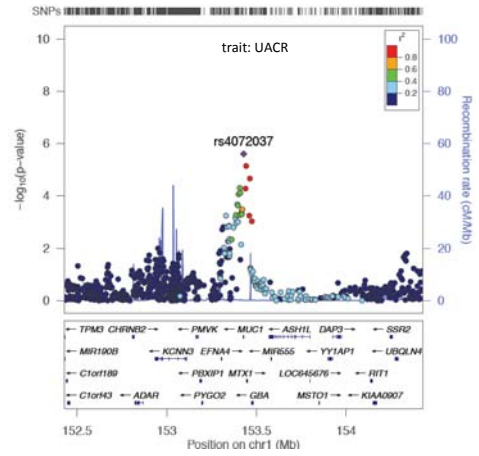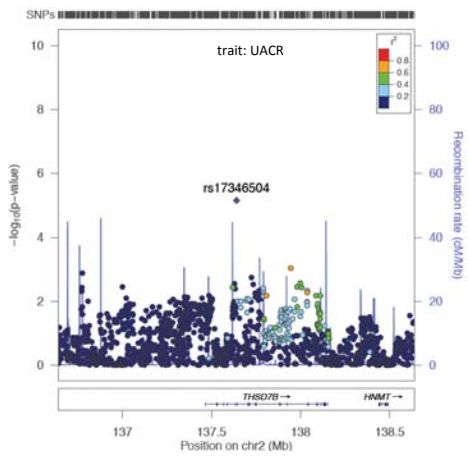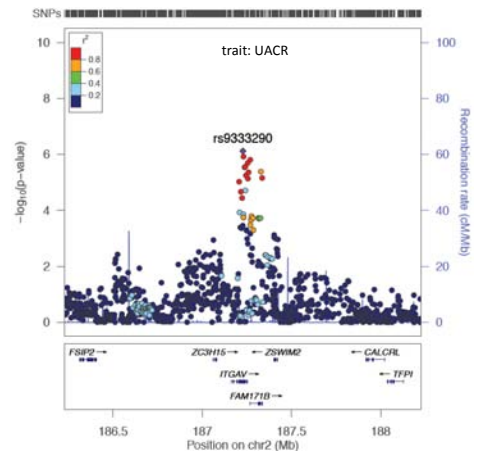

SUPPLEMENTARY DATA

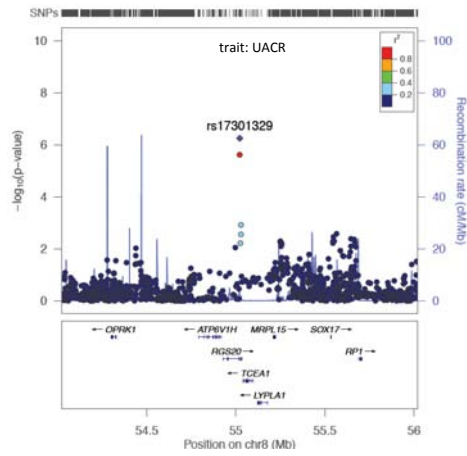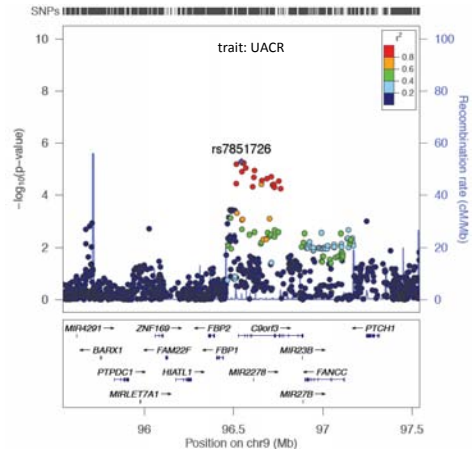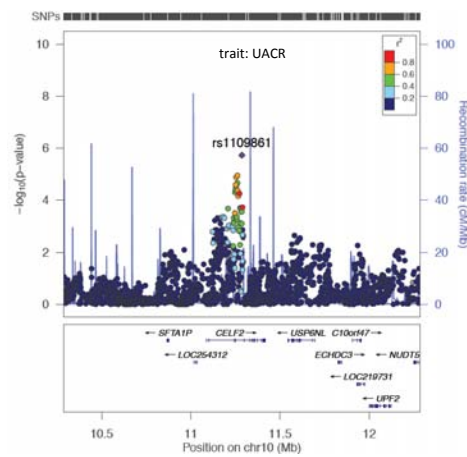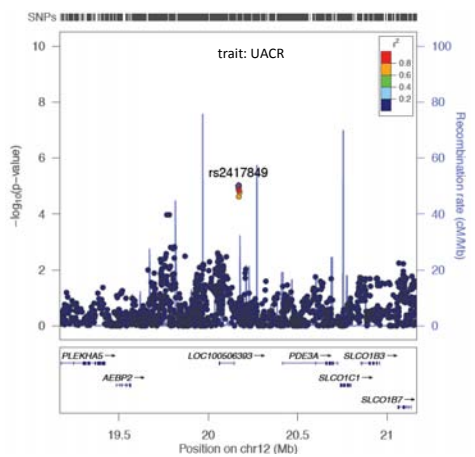



SUPPLEMENTARY DATA

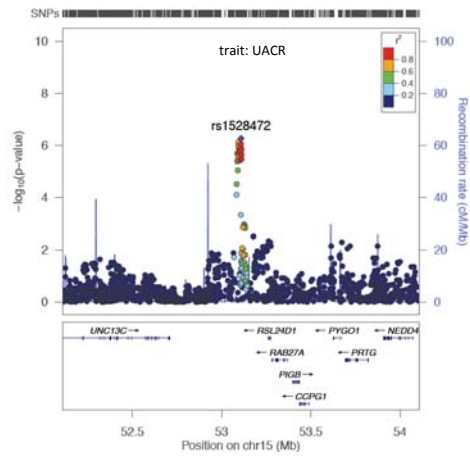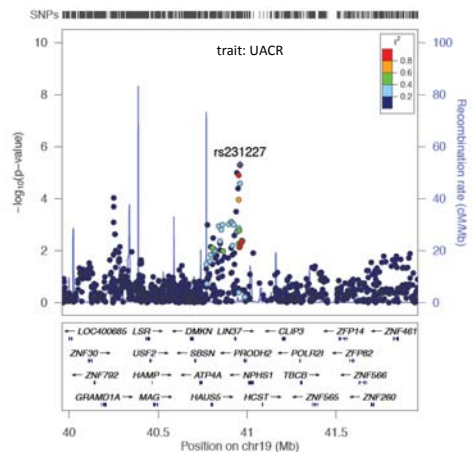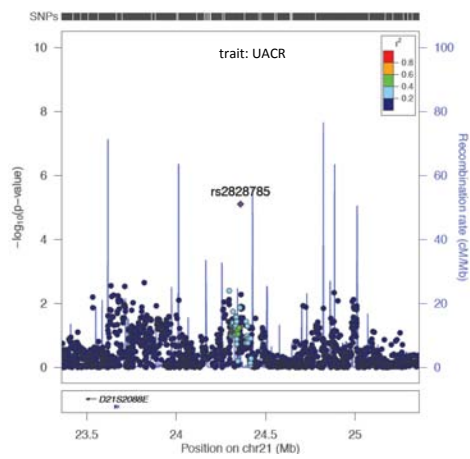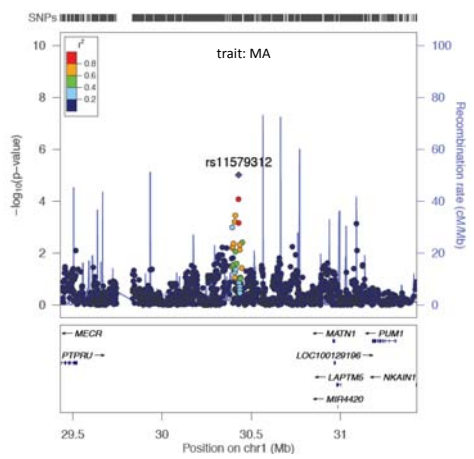

SUPPLEMENTARY DATA

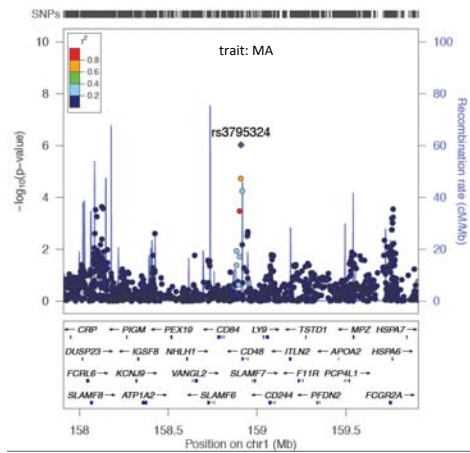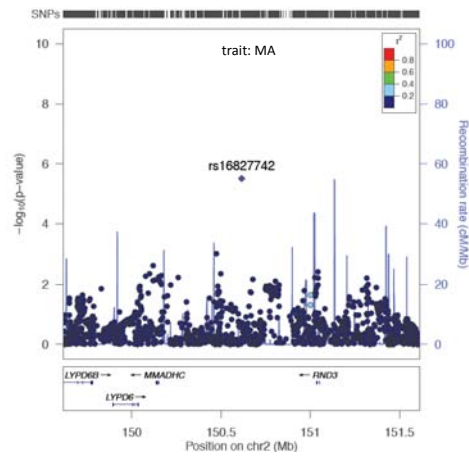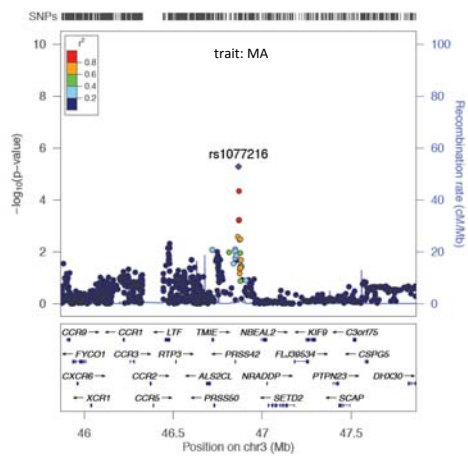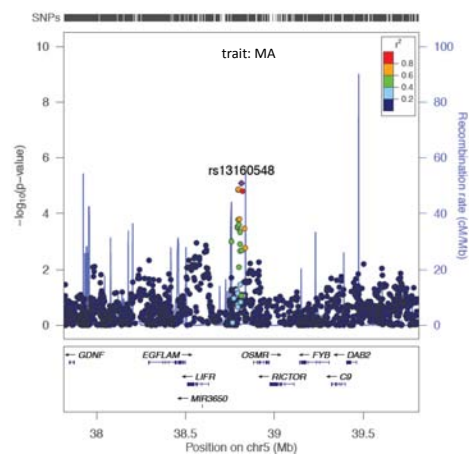

SUPPLEMENTARY DATA

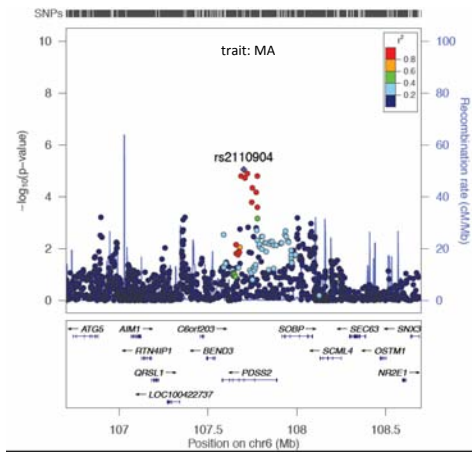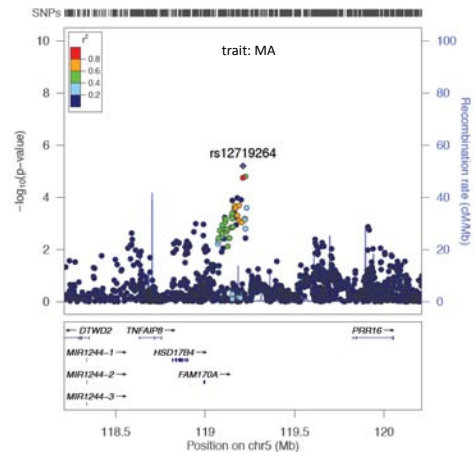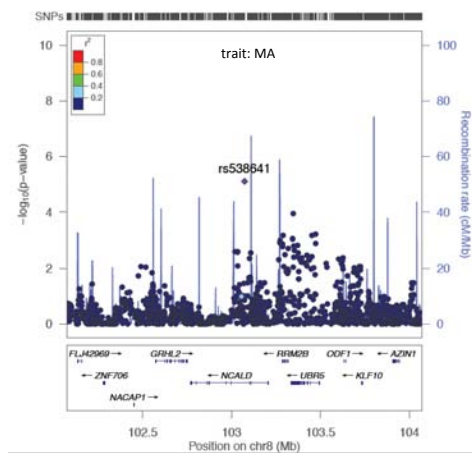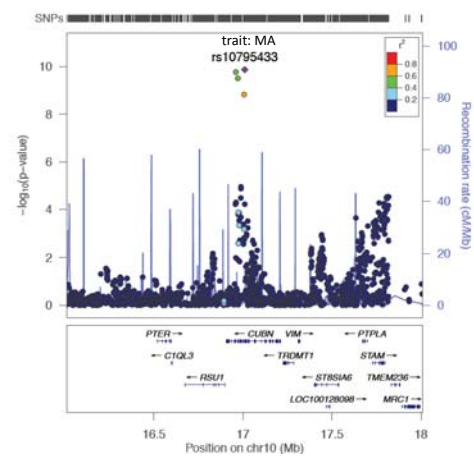

SUPPLEMENTARY DATA

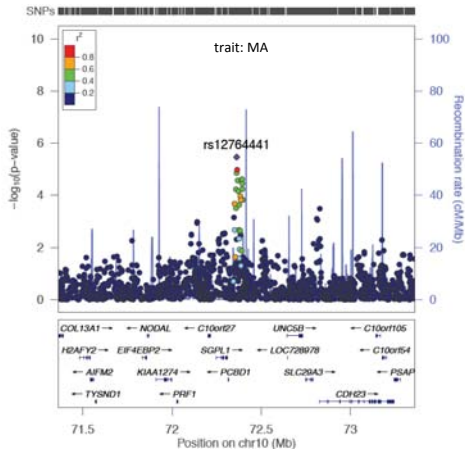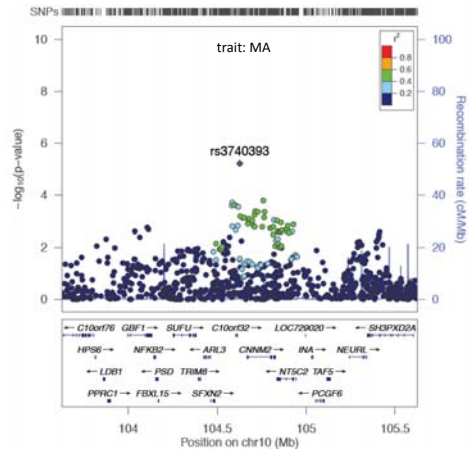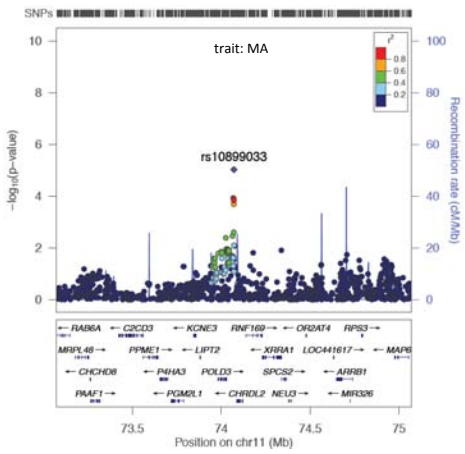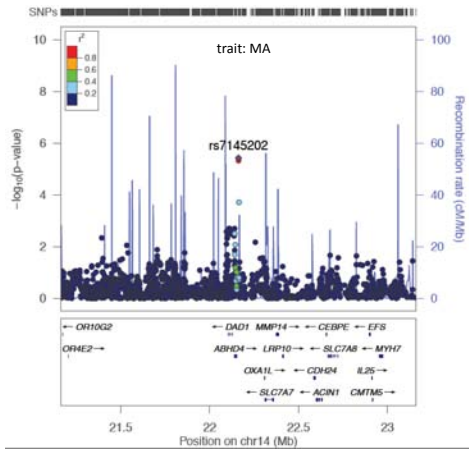

SUPPLEMENTARY DATA

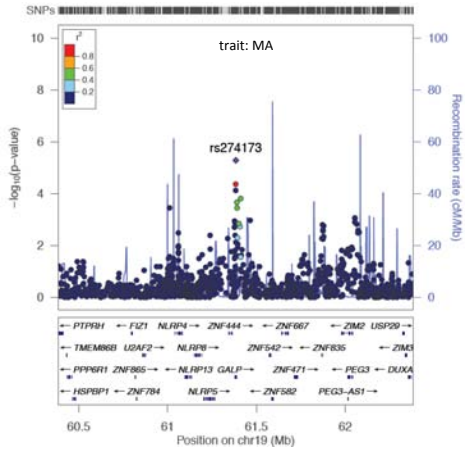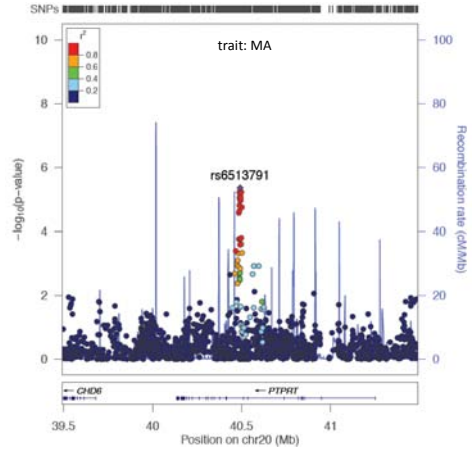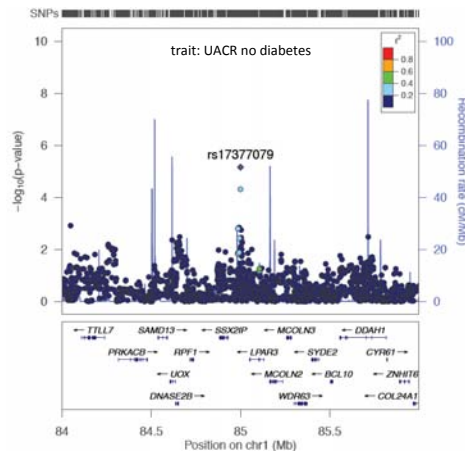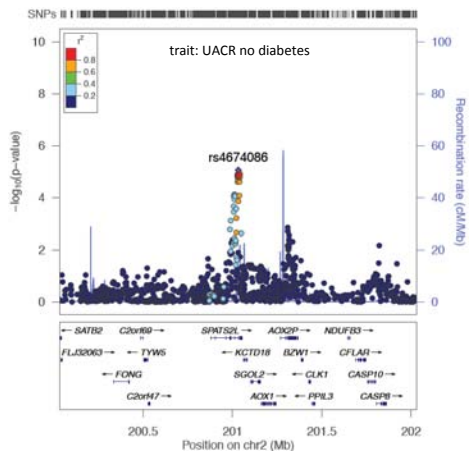

SUPPLEMENTARY DATA

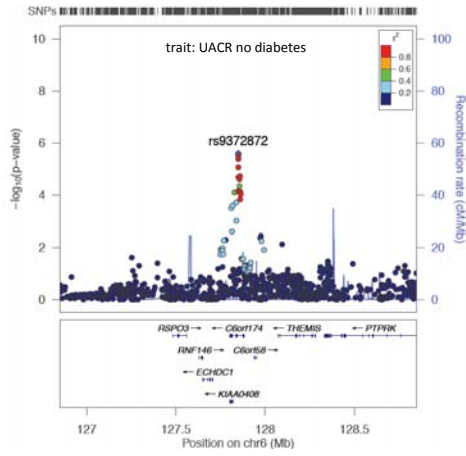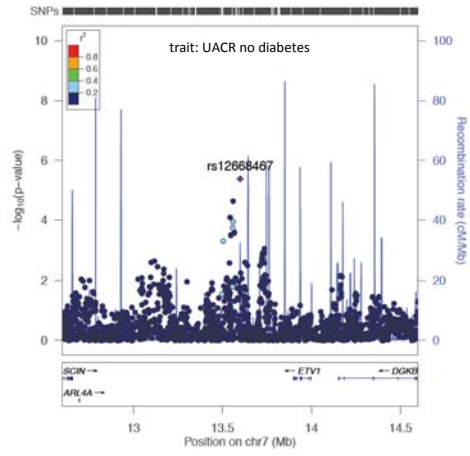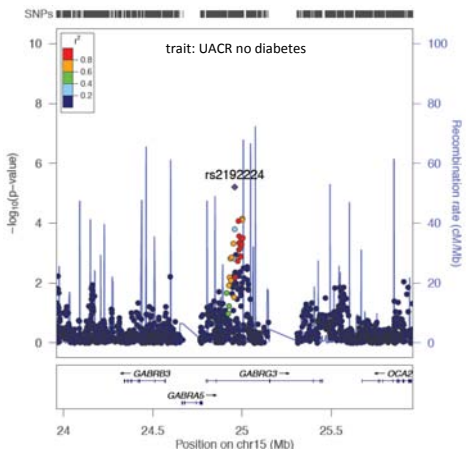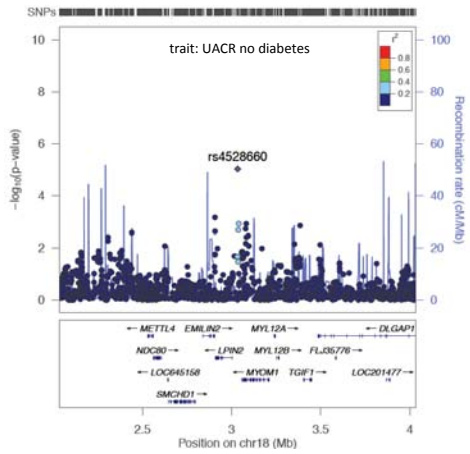

SUPPLEMENTARY DATA

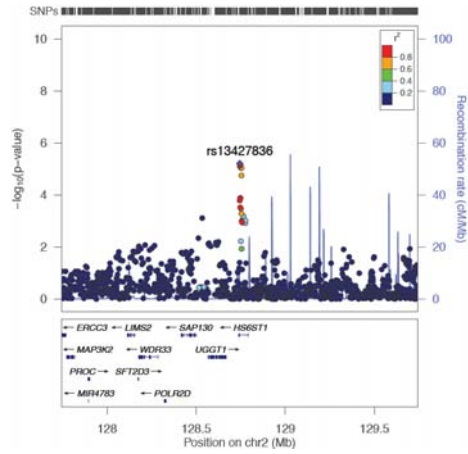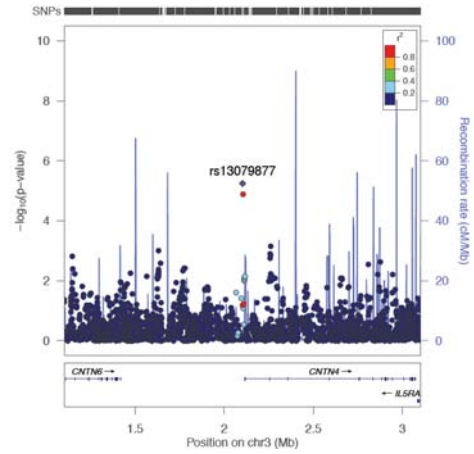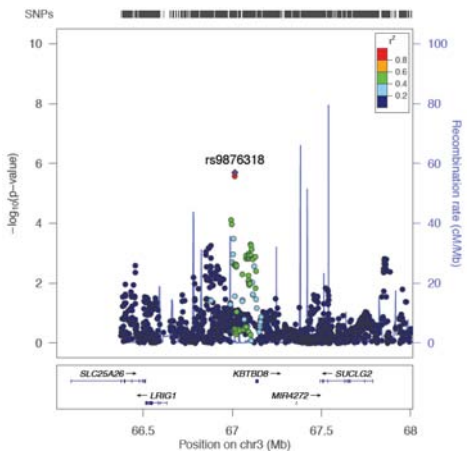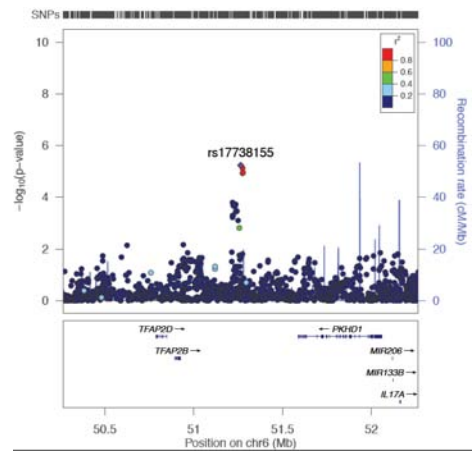

SUPPLEMENTARY DATA

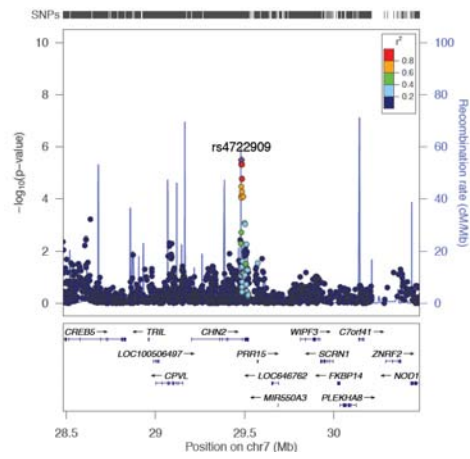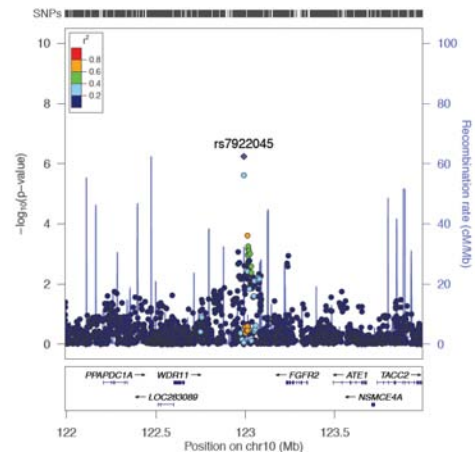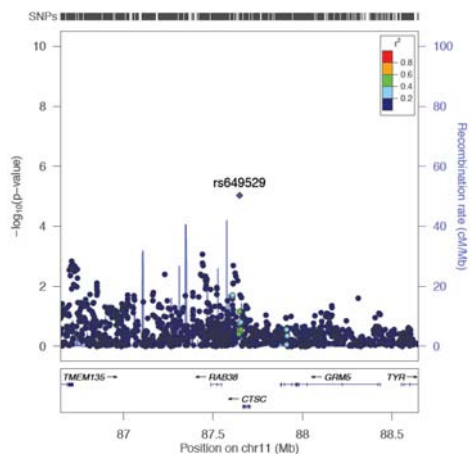



## SUPPLEMENTARY DATA

### Supplementary Figure 4: Evaluation of glomerulosclerosis in Rab38 KO, congenic and transgenic rats.

Representative images of trichrome-stained glomeruli from *Rab38* congenic, KO and transgenic animals. The glomerulosclerosis score was determined from left kidneys of 13-week-old rats (n=3 of each strain) as described previously (O'Meara CC *et al.* JASN, 2011). 50 to 60 40x magnified cortical glomeruli were imaged and scored, and scores were averaged for each animal. \*p<0.05, \*\*p<0.01 KO vs. transgenic, ##p<0.01 KO vs. congenic. Glomerulosclerosis was analyzed using one-way ANOVA followed by Tukey's post hoc test.

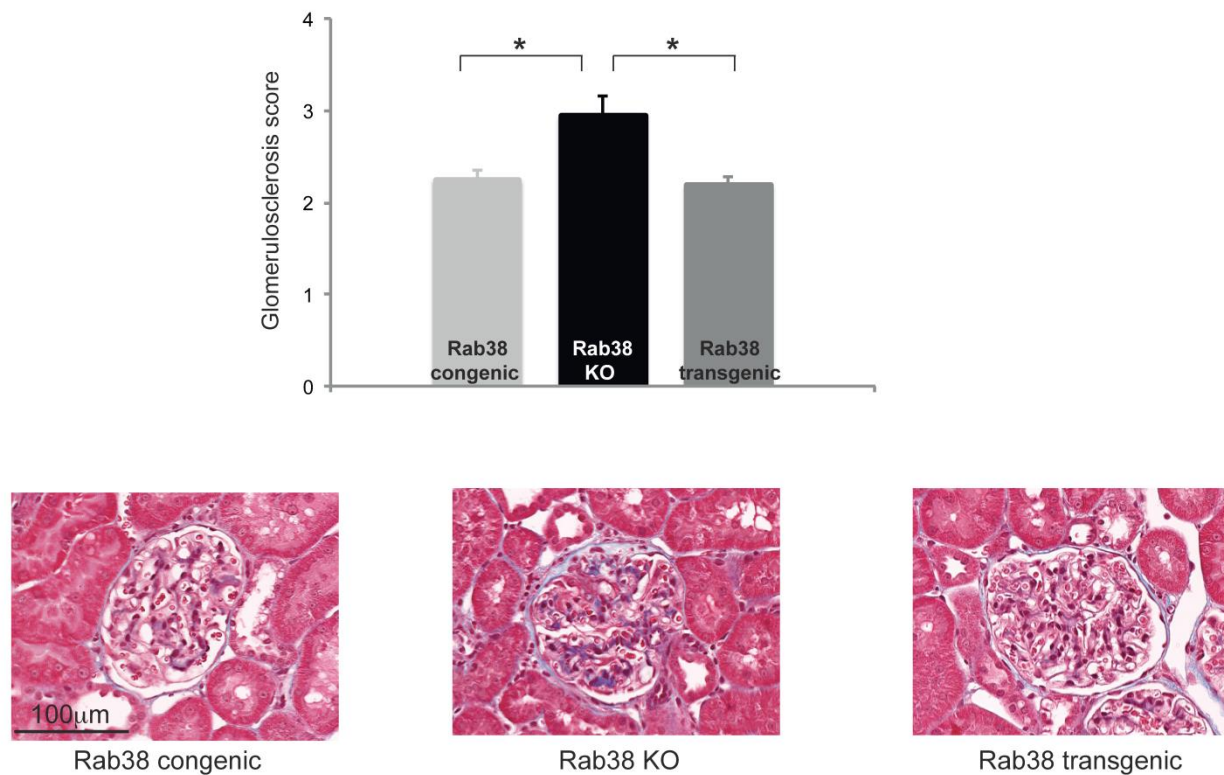

SUPPLEMENTARY DATA

**Supplementary Table 1: Characteristics of the study populations**

| Study                    | UACR sample size | Women, % | Age (years)  | eGFR <60 (ml/min/1.73m <sup>2</sup> ) <sup>1</sup> | HTN, % | DM, % | UACR (mg/g) (median, 25th%, 75th%) | MA, % |
|--------------------------|------------------|----------|--------------|----------------------------------------------------|--------|-------|------------------------------------|-------|
| <b>Discovery cohorts</b> |                  |          |              |                                                    |        |       |                                    |       |
| 3C                       | 1072             | 63.6     | 77.8 (4.8)   | 19.9                                               | 74.4   | 12.3  | 5.3 (2.6, 10.7)                    | 11.7  |
| Advance                  | 2203             | 32.8     | 66.7 (6.76)  | 14.7                                               | 47.6   | 100   | 15.6 (6.44, 54.8)                  | 45    |
| AGES                     | 3196             | 58       | 76.4 (5.46)  | 24.2                                               | 80.6   | 11.5  | 2.66 (1.2, 7.0)                    | 11.9  |
| Amish**                  | 727              | 48.9     | 49.5 (16.9)  | 3.1                                                | 18.9   | 1.7   | 7 (4.3, 13.5)                      | NA    |
| ARIC                     | 7243             | 53.1     | 61.8 (6.1)   | 8.7                                                | 40.7   | 14.2  | 5.3 (3.0, 9.5)                     | 9.4   |
| BLSA**                   | 361              | 46.1     | 70.4 (15.2)  | 17.4                                               | 21.9   | 7.7   | 7 (4.4, 11.0)                      | NA    |
| CHS                      | 1865             | 61.3     | 71.9 (5.0)   | 9.5                                                | 51.4   | 11    | 9.3 (5.3, 19.9)                    | 23    |
| COLAUS                   | 5311             | 53.2     | 53.4 (10.8)  | 3.8                                                | 36.1   | 9.6   | 5.1 (3.4, 9.1)                     | 9.5   |
| CROATIA-SPLIT**          | 472              | 59.8     | 49.3 (14.65) | 5                                                  | 39.4   | 5     | 2.5 (1.3, 5.8)                     | 7.8   |
| EPIC                     | 2371             | 53.3     | 59.2 (9.00)  | 29.87                                              | 49.3   | 3     | 3.6 (1.5, 8.3)                     | 8.1   |
| Fenland**                | 1398             | 56.2     | 44.9 (7.3)   | 0.9                                                | 18.9   | 1.4   | 4.5 (3.2, 7.1)                     | 5.5   |
| FHS                      | 6523             | 54.3     | 51.2 (14.0)  | 10.7                                               | 57.5   | 9.7   | 4.58 (2.62, 9.89)                  | 9.69  |
| INCIPE**                 | 940              | 52.7     | 61.0 (11.0)  | 8.6                                                | 69.6   | 10.6  | NA*                                | 7.4   |
| KORA-F3                  | 1530             | 50.5     | 62.5 (10.1)  | 10.8                                               | 41.1   | 11.1  | 4.9 (2.1, 11.1)                    | 12.5  |
| KORA-F4                  | 1804             | 51.3     | 60.9 (8.9)   | 7                                                  | 20.9   | 9.2   | 6.1 (3.8, 11.9)                    | 12.5  |
| LIFELINES                | 8085             | 57.2     | 47.4 (11.2)  | NA                                                 | 31.5   | 2.2   | 3.12 (2.2, 4.7)                    | 2.4   |
| MESA                     | 2511             | 52.3     | 62.67 (10.2) | 9.72                                               | 38.6   | 5.99  | 4.60 (3.10, 8.50)                  | 9.52  |
| MICROS**                 | 504              | 56.5     | 46.2 (16.1)  | 3.8                                                | 37.7   | 4.3   | 6.0 (4.0, 9.0)                     | 5.4   |
| PREVEND                  | 3634             | 48.4     | 49.6 (12.5)  | 3.3                                                | 31.8   | 3.4   | 7.9 (5.0, 15.5)                    | 10.2  |
| SHIP                     | 2655             | 51.7     | 54.5 (15.3)  | 7.7                                                | 51.1   | 11.2  | 8.95 (5.00, 20.59)                 | 25.2  |
| SHIP-TREND**             | 985              | 56.2     | 50.1 (13.7)  | 4.3                                                | 39.6   | 1.8   | 6 (3.9, 10.3)                      | 8.5   |
| <b>Total</b>             | <b>55390</b>     |          |              |                                                    |        |       |                                    |       |

## SUPPLEMENTARY DATA

| <b>Replication cohorts</b> |              |      |       |      |       |       |                   |       |
|----------------------------|--------------|------|-------|------|-------|-------|-------------------|-------|
| ESTHER                     | 2958         | 55.6 | 61.87 | 15.7 | 57.52 | 15.87 | 9.8 (6.2, 19.7)   | 23.06 |
| GANI_MED                   | 1674         | 44.0 | 60.0  | 36.1 | 71.2  | 24.9  | 11.8 (6.1, 43.9)  | 37.2  |
| GENDIAN                    | 450          | 47.1 | 65.05 | 32.3 | 53    | 100   | 7.54 (3.57,23.65) | 27.6  |
| KORAF4 non-GWAS            | 1195         | 52.4 | 49.2  | 5.8  | 13.3  | 4     | 5.7 (3.5, 11.4)   | 23.6  |
| KORAF3 non-GWAS            | 1389         | 52.5 | 51.7  | 2.6  | 29.4  | 5.1   | 4.4 (1.87, 9.6)   | 11    |
| SAPHIR                     | 1690         | 37.1 | 51.4  | 6.9  | 55.7  | 3.3   | 3.8 (2.3, 8.3)    | 9.9   |
| SKIPOGH**                  | 807          | 52.3 | 47.1  | 5.7  | 22.9  | 4.5   | 4.2 (2.7, 7.7)    | 5.7   |
| Vanderbilt Omni1           | 472          | 47.3 | 54.5  | 27.7 | 70.5  | 18    | 11.5 (6.0, 39.0)  | 36.7  |
| Vanderbilt Omni5           | 144          | 46.9 | 50.5  | 21.7 | 58.2  | 33.3  | 14.5 (6.0, 42.2)  | 35.4  |
| Vanderbilt 660W            | 365          | 56.5 | 56.5  | 20.6 | 57.2  | 17.9  | 9.0 (5.0, 26.0)   | 30.7  |
| <b>Total</b>               | <b>11144</b> |      |       |      |       |       |                   |       |

\*Because of the lower detection limit of the assay, the INCIPE Study only contributed to analyses of MA.

\*\*Studies that did not contribute data for analyses of MA or UACR among those with diabetes because of low case numbers.

<sup>1</sup>Timepoint of serum creatinine measurement can differ from that of urinary albumin measurements in some of the studies.

SUPPLEMENTARY DATA

**Supplementary Table 2: Information about study design and UACR measurement**

| Study                  | Study Design                 | Total genotyped sample size | Study exclusions or disease enrichment, and data quality control              | Urinary albumin measurements + QC                                                                                                                                                                        | Key Study References                                                                                                                                                                                                                                                                                                                                                                                                                                                                                                                                                                                                                                                                                                                                                                                                                                                                                                                                                                                             |
|------------------------|------------------------------|-----------------------------|-------------------------------------------------------------------------------|----------------------------------------------------------------------------------------------------------------------------------------------------------------------------------------------------------|------------------------------------------------------------------------------------------------------------------------------------------------------------------------------------------------------------------------------------------------------------------------------------------------------------------------------------------------------------------------------------------------------------------------------------------------------------------------------------------------------------------------------------------------------------------------------------------------------------------------------------------------------------------------------------------------------------------------------------------------------------------------------------------------------------------------------------------------------------------------------------------------------------------------------------------------------------------------------------------------------------------|
| <b>Discovery study</b> |                              |                             |                                                                               |                                                                                                                                                                                                          |                                                                                                                                                                                                                                                                                                                                                                                                                                                                                                                                                                                                                                                                                                                                                                                                                                                                                                                                                                                                                  |
| 3C                     | Prospective population-based | 1072                        | <b>Study exclusions or disease enrichment:</b> none. <b>Exclusions.</b> none. | At 4-year follow-up, urinary albumin and creatinine were measured in a fresh morning urine sample in a single laboratory using an immunoturbidimetric assay for albumin and Jaffe method for creatinine. | <p>1. The 3C Study Group. Vascular factors and risk of dementia. Design of the Three-City Study and baseline characteristics of the study population. <i>Neuroepidemiology</i>. 2003; 22:316-325.</p> <p>2. Lambert J-C, Heath S, Even G, Champion D, Slegers K, Hiltunen M, Combarros O, Zelenika D, Bullido MJ, Tavernier B, Letenneur L, Bettens K, Berr B, Pasquier F, Fiévet N, Barberger-Gateau P, Engelborghs S, De Deyn P, Mateo I, Franck F, Helisalmi S, Porcellini E, Hanon O, the European Alzheimer's Disease Investigators, De Pancorbo MM, Lendon C, Dufouil C, Jaillard C, Leveillard T, Alvarez V, Bosco P, Mancuso M, Panza F, Nacmias B, Bossù P, Piccardi P, Annoni G, Seripa D, Galimberti D, Hannequin D, Licastro F, Soininen H, Ritchie K, Galan P, Dartigues J-F, Tzourio C, Gut I, Van Broeckhoven C, Alperovitch A, Lathrop M, Amouyel P. Genome-wide association study identifies variants at CLU and CR1 associated with Alzheimer's disease. <i>Nat Genet</i>. 2009;41:1094-9.</p> |

SUPPLEMENTARY DATA

|         |                                   |      |                                                                                                                                                                                                                                                                                                                                                                                                                                                 |                                                                                                                                                                                                                                                                                                                                                           |                                                                                                                                                                                                                                                                                                                                                                                                                                                                                                     |
|---------|-----------------------------------|------|-------------------------------------------------------------------------------------------------------------------------------------------------------------------------------------------------------------------------------------------------------------------------------------------------------------------------------------------------------------------------------------------------------------------------------------------------|-----------------------------------------------------------------------------------------------------------------------------------------------------------------------------------------------------------------------------------------------------------------------------------------------------------------------------------------------------------|-----------------------------------------------------------------------------------------------------------------------------------------------------------------------------------------------------------------------------------------------------------------------------------------------------------------------------------------------------------------------------------------------------------------------------------------------------------------------------------------------------|
| Advance | Randomized controlled trial       | 2203 | <b>Study exclusions or disease enrichment:</b> multicenter trial done by 215 collaborating centres in 20 countries, including 11,140 type 2 diabetes subjects all of Caucasian origin. <b>Exclusions:</b> 8829 with no genotype; 10 samples excluded due to sex mismatch, high sample missingness or having <0.8 of Caucasian ethnicity (STRUCTURE 2.3). Of the 2301 remaining samples of good genotype quality, 98 did not have data for UACR. | Urinary albumin and creatinine were measured in the same morning fresh sample in local certified laboratories using local regulations in 20 countries. Units were harmonized centrally by the George Institute. Two samples were required for the determination of the stage of albuminuria. UACR were repeated every 6 months during a 5-year follow-up. | 1. Ninomiya T et al. Albuminuria and kidney function independently predict cardiovascular and renal outcomes in diabetes. <i>J Am Soc Nephrol.</i> 2009 Aug;20(8):1813-21.<br>2. Patel A et al for the ADVANCE Collaborative Group. Effects of a fixed combination of perindopril and indapamide on macrovascular and microvascular outcomes in patients with type 2 diabetes mellitus (the ADVANCE trial). <i>Lancet</i> 2007; 370: 829-40.                                                        |
| AGES    | Population-based                  | 3196 | <b>Study information or disease enrichment:</b> none. <b>Exclusions:</b> exclusion criteria included sample failure, genotype mismatch with reference panel, and sex mismatch, resulting in clean genotype data on 3,219 individuals.                                                                                                                                                                                                           | Urinary albumin was measured in a morning urine sample using the Tina-quant immunoturbimetric assay (Roche Diagnostics, Mannheim). The intra-assay CV was 7.2%. Urinary creatinine in the same samples was measured using the HiCo Creatinine Jaffe method (Roche Diagnostics, Mannheim). The intra-assay CV was 4.2%.                                    | Harris TB, Launer LJ, Eiriksdottir G, Kjartansson O, Jonsson PV, Sigurdsson G, Thorgeirsson G, Aspelund T, Garcia ME, Cotch MF, Hoffman HJ, Gudnason V. Age, Gene/Environment Susceptibility-Reykjavik Study: multidisciplinary applied phenomics. <i>Am J Epidemiol.</i> 2007 May 1;165(9):1076-87.                                                                                                                                                                                                |
| Amish   | Population-based "founder" cohort | 727  | <b>Study information or disease enrichment:</b> none. <b>Exclusions:</b> age < 20, severe chronic disease, call rate < 95%.                                                                                                                                                                                                                                                                                                                     | Urinary albumin concentration was measured from stored samples using a quantitative immunoturbimetric assay (Roche Diagnostics, Indianapolis), and creatinine in urine was measured using a modified Jaffe method.                                                                                                                                        | 1. Mitchell BD et al. The genetic response to short-term interventions affecting cardiovascular function: rationale and design of the Heredity and Phenotype Intervention (HAPI) Heart Study. <i>Am. Heart J.</i> 155, 823-828 (2008).<br>2. Rumpersaud E et al. The association of coronary artery calcification and carotid artery intima-media thickness with distinct, traditional coronary artery disease risk factors in asymptomatic adults. <i>Am. J. Epidemiol.</i> 168, 1016-1023 (2008). |

SUPPLEMENTARY DATA

|      |                               |      |                                                                                                                                                                                                                                                                                                                                                                                                                                                                                                                                                                                                                                                                                          |                                                                                                                                                                                                                                                                                          |                                                                                                                                                                                                                                                                                                                                                                                                   |
|------|-------------------------------|------|------------------------------------------------------------------------------------------------------------------------------------------------------------------------------------------------------------------------------------------------------------------------------------------------------------------------------------------------------------------------------------------------------------------------------------------------------------------------------------------------------------------------------------------------------------------------------------------------------------------------------------------------------------------------------------------|------------------------------------------------------------------------------------------------------------------------------------------------------------------------------------------------------------------------------------------------------------------------------------------|---------------------------------------------------------------------------------------------------------------------------------------------------------------------------------------------------------------------------------------------------------------------------------------------------------------------------------------------------------------------------------------------------|
| ARIC | Prospective, population-based | 7243 | <b>Study information or disease enrichment:</b> none. <b>Exclusions:</b> of the 9713 genotyped individuals of European ancestry, we excluded 658 individuals based on discrepancies with previous genotypes, disagreement between reported and genotypic sex, one randomly selected member of a pair of first-degree relatives, or outlier based on measures of average DST or more than 8 SD away on any of the first 10 principal components. Additional samples were excluded for this analysis because of the unavailability of the phenotype.                                                                                                                                       | Using stored specimen from samples collected at visit 4, urinary albumin was measured by a nephelometric method either on the Dade Behring BN100 or on the Beckman Image Nephelometer. Urinary creatinine was measured using the Jaffe method.                                           | The Atherosclerosis Risk in Communities (ARIC) Study: design and objectives. The ARIC investigators. Am J Epidemiol. 1989 Apr;129(4):687-702.                                                                                                                                                                                                                                                     |
| BLSA | Population-based              | 361  | <b>Study information or disease enrichment:</b> none. <b>Exclusions:</b> non-European descent or with missing UACR information.                                                                                                                                                                                                                                                                                                                                                                                                                                                                                                                                                          | Urinary measurements were conducted on 24-hour urine samples. Urinary albumin was determined with nephelometry (Beckman Array System). Urinary creatinine was measured using a Vitros enzymatic assay (Johnson & Johnson Co., Rochester, NY).                                            | Shock NW et al. Normal Human Aging: The Baltimore Study of Aging. 1984.                                                                                                                                                                                                                                                                                                                           |
| CHS  | Prospective population-based  | 1865 | <b>Study information or disease enrichment:</b> A total of 1908 persons were excluded from the GWAS study sample due to the presence at study baseline of coronary heart disease, congestive heart failure, peripheral vascular disease, valvular heart disease, stroke or transient ischemic attack or lack of available DNA. <b>Exclusions:</b> The present report is based upon genotyping results from 3,329 CHS Caucasian participants, who were free of clinical cardiovascular disease at baseline, consented to genetic testing, and had DNA available for genotyping. Genotypes were called using the Illumina BeadStudio software. Genotyping was successful in 3,291 persons. | Urinary parameters were measured from a morning urine sample. The albumin was measured by rate nephelometry (Array 360 CE Protein Analyzer, Beckman Instruments, Fullerton, CA). The creatinine was measured using a Kodak Ektachem 700 Analyzer (Eastman Kodak company, Rochester, NY). | 1. Fried LP, Borhani NO, Enright P, Furberg CD, Gardin JM, Kronmal RA, Kuller LH, Manolio TA, Mittelmark MB, Newman A, et al. The Cardiovascular Health Study: design and rationale. Ann Epidemiol. 1991;1(3):263-276.<br>2. Heard-Costa, NL et al. NRXN3 is a novel locus for waist circumference: a genome-wide association study from the CHARGE Consortium. 2009. Plos Genet. 5(6): e1000539. |

SUPPLEMENTARY DATA

|               |                  |      |                                                                                                                                                                                                                                                                                                                                                                                                                               |                                                                                                                                                                                                                                                                                                   |                                                                                                                                                                                                                                                                                                                                                                                                                    |
|---------------|------------------|------|-------------------------------------------------------------------------------------------------------------------------------------------------------------------------------------------------------------------------------------------------------------------------------------------------------------------------------------------------------------------------------------------------------------------------------|---------------------------------------------------------------------------------------------------------------------------------------------------------------------------------------------------------------------------------------------------------------------------------------------------|--------------------------------------------------------------------------------------------------------------------------------------------------------------------------------------------------------------------------------------------------------------------------------------------------------------------------------------------------------------------------------------------------------------------|
| COLAUS        | Population-based | 5311 | <b>Study exclusions or disease enrichment:</b> none. <b>Exclusions:</b> samples with call rate < 90% and related individuals.                                                                                                                                                                                                                                                                                                 | Urinary albumin was measured using a Bromocresol green assay (Roche Diagnostics, Basel, Switzerland). The inter- and intra-assay CVs were 2.5% and 0.4%. Urinary creatinine was measured using a Jaffe kinetic compensated method. The inter- and intra-assay CVs were 2.9% and 0.7%.             | Firmann M, Mayor V, Vidal PM, Bochud M, Pécoud A, Hayoz D, Paccaud F, Preisig M, Song KS, Yuan X, Danoff TM, Stirnadel HA, Waterworth D, Mooser V, Waeber G, Vollenweider P. The CoLaus study: a population-based study to investigate the epidemiology and genetic determinants of cardiovascular risk factors and metabolic syndrome. <i>BMC Cardiovasc Disord.</i> 2008 Mar 17;8:6. doi: 10.1186/1471-2261-8-6. |
| CROATIA-SPLIT | Population-based | 472  | <b>Study exclusions or disease enrichment:</b> none. <b>Exclusions:</b> missing UACR levels.                                                                                                                                                                                                                                                                                                                                  | Urinary albumin excretion was measured, in stored urine samples, by an automated assay based on a turbimetric method with automatic calibration and quality control (Synchron CX System, Beckman Coulter).                                                                                        | "10001 Dalmatians" Croatia launches its national biobank Rudan I, Marusić A, Janković S, Rotim K, Boban M, Lauc G, Grković I, Dogas Z, Zemunik T, Vatauvuk Z, Bencić G, Rudan D, Mulić R, Krzelj V, Terzić J, Stojanović D, Puntarić D, Bilić E, Ropac D, Vorko-Jović A, Znaor A, Stevanović R, Biloglav Z, Polasek O. <i>Croat Med J.</i> 2009 Feb;50(1):4-6.                                                     |
| EPIC          | Population-based | 2371 | <b>Study exclusions or disease enrichment:</b> participants taking colchicine, probenecid or allopurinol at 1st, 2nd health checks or 3rd follow-up; gout from hospital discharge ICD10 M10, between 1997-2008. <b>Exclusions:</b> none.                                                                                                                                                                                      | Urinary albumin was measured in spot urine by immunonephelometry using the Nephelometer II analyzer (Dade Behring, Marburg, Germany). The intra-assay CV was 2.91%. Urinary creatinine was measured by means of colorimetry using the Dimension AR Analyzer (Dade Behring Marburg, Germany).      | 1. Day N et al. EPIC-Norfolk: study design and characteristics of the cohort. <i>European Prospective Investigation of Cancer. Br J Cancer</i> 80 Suppl 1, 95-103 (1999).<br>2. Lee CT et al. Cross-sectional association between fish consumption and albuminuria: the European Prospective Investigation of Cancer-Norfolk Study. <i>Am J Kidney Dis</i> 52, 876-86 (2008).                                      |
| Fenland       | Population-based | 1398 | <b>Study exclusions or disease enrichment:</b> exclusion criteria for the study were: age<30 or age>55, prevalent diabetes, pregnant and lactating women, inability to participate including terminal illness, psychotic illness, or inability to walk unaided. <b>Exclusions:</b> 102 excluded due to call rate < 95%, heterozygosity check (upper bound 0.2882, lower bound 0.2735), relatedness check and duplicate check. | Using stored samples, urinary albumin was measured by means of immunonephelometry using the Nephelometer II analyzer (Dade Behring, Marburg, Germany; intra-assay CV 2.91%). Urinary creatinine was measured through colorimetry using the Dimension AR Analyzer (Dade Behring Marburg, Germany). | Willer CJ, Speliotes EK, Loos RJ et al. (2009) Six new loci associated with body mass index highlight a neuronal influence on body weight regulation. <i>Nat Genet</i> , 41(1): 25-34.                                                                                                                                                                                                                             |

SUPPLEMENTARY DATA

|         |                                   |      |                                                                                                                                                                                                                                                                                                                                                                                               |                                                                                                                                                                                                                                                                                                                                                                                                 |                                                                                                                                                                                                                                                                                                                                                                                                                                                                                                                                                                                                                                                                                                                                                                                                        |
|---------|-----------------------------------|------|-----------------------------------------------------------------------------------------------------------------------------------------------------------------------------------------------------------------------------------------------------------------------------------------------------------------------------------------------------------------------------------------------|-------------------------------------------------------------------------------------------------------------------------------------------------------------------------------------------------------------------------------------------------------------------------------------------------------------------------------------------------------------------------------------------------|--------------------------------------------------------------------------------------------------------------------------------------------------------------------------------------------------------------------------------------------------------------------------------------------------------------------------------------------------------------------------------------------------------------------------------------------------------------------------------------------------------------------------------------------------------------------------------------------------------------------------------------------------------------------------------------------------------------------------------------------------------------------------------------------------------|
| FHS     | Prospective family-based          | 6523 | <b>Study exclusions or disease enrichment:</b> none. <b>Exclusions:</b> Of the 9,274 participants who underwent genotyping, we made the following exclusions: sample call rate <97% (n=666), genotype heterozygosity > 5 standard deviations, and ambiguous family data (n=127). This resulted in a total of 8,481 genotyped individuals. Of them, 1958 did not have the phenotype available. | Urinary albumin was measured from stored samples using a Tina-quant immunoturbidimetric assay (Roche Diagnostics, Indianapolis, Indiana). The intra-assay CV was 7.2% for the Offspring cohort and 2.1% for the Third Generation. Urinary creatinine was measured using a modified Jaffe method. Its intra-assay CV was 2.3% for the Offspring cohort and 1.0% for the Third Generation cohort. | <ol style="list-style-type: none"> <li>1. Feinleib M, Kannel WB, Garrison RJ, McNamara PM, Castelli WP. The Framingham Offspring Study. Design and preliminary data. <i>Prev Med.</i> 1975;4:518-525.</li> <li>2. Kannel WB, Feinleib M, McNamara PM, Garrison RJ, Castelli WP. An investigation of coronary heart disease in families. The Framingham offspring study. <i>Am J Epidemiol.</i> 1979;110:281-290.</li> <li>3. Splansky GL, Corey D, Yang Q, Atwood LD, Cupples LA, Benjamin EJ, D'Agostino RB, Sr., Fox CS, Larson MG, Murabito JM, O'Donnell CJ, Vasan RS, Wolf PA, Levy D. The Third Generation Cohort of the National Heart, Lung, and Blood Institute's Framingham Heart Study: design, recruitment, and initial examination. <i>Am J Epidemiol.</i> 2007;165:1328-1335.</li> </ol> |
| INCIPE  | Cross-sectional, population based | 940  | <b>Study exclusions or disease enrichment:</b> individuals <40 year old. <b>Exclusions:</b> pregnant women                                                                                                                                                                                                                                                                                    | Using stored specimen, urinary albumin was measured by a nephelometric method. Urinary creatinine was measured using the Jaffé method.                                                                                                                                                                                                                                                          | Gambaro, G. et al. Prevalence of CKD in northeastern Italy: results of the INCIPE study and comparison with NHANES. <i>Clin. J. Am. Soc. Nephrol.</i> 5, 1946-1953 (2010).                                                                                                                                                                                                                                                                                                                                                                                                                                                                                                                                                                                                                             |
| KORA-F3 | Prospective population-based      | 1530 | <b>Study exclusions or disease enrichment:</b> none. <b>Exclusions:</b> none.                                                                                                                                                                                                                                                                                                                 | Using stored urine samples, urinary albumin concentration was measured with a latex enhanced nephelometric assay (Siemens Healthcare Diagnostics) on a Dade Behring BN2 apparatus. Urinary creatinine concentration was measured using an enzymatic method.                                                                                                                                     | <ol style="list-style-type: none"> <li>1. Baumeister SE, Böger CA, Krämer BK, Doring A, Eheberg D, Fischer B, John J, Koenig W &amp; Meisinger C: Effect of chronic kidney disease and comorbid conditions on health care costs: A 10-year observational study in a general population. <i>Am J Nephrol</i> 31: 222-229, 2010.</li> <li>2. Wichmann HE, Gieger C &amp; Illig T: KORA-gen--resource for population genetics, controls and a broad spectrum of disease phenotypes. <i>Gesundheitswesen</i> 67 Suppl 1: S26-30, 2005.</li> </ol>                                                                                                                                                                                                                                                          |



SUPPLEMENTARY DATA

|           |                                 |      |                                                                                                                                     |                                                                                                                                                                                                                                                                           |                                                                                                                                                                                                                                                                                                                                                                                                                                                                         |
|-----------|---------------------------------|------|-------------------------------------------------------------------------------------------------------------------------------------|---------------------------------------------------------------------------------------------------------------------------------------------------------------------------------------------------------------------------------------------------------------------------|-------------------------------------------------------------------------------------------------------------------------------------------------------------------------------------------------------------------------------------------------------------------------------------------------------------------------------------------------------------------------------------------------------------------------------------------------------------------------|
| KORA-F4   | Prospective population-based    | 1804 | <b>Study exclusions or disease enrichment:</b> none. <b>Exclusions:</b> none.                                                       | Using stored urine samples, urinary albumin concentration was measured with a latex enhanced nephelometric assay (Siemens Healthcare Diagnostics) on a Dade Behring BN2 apparatus. Urinary creatinine concentration was measured using a kinetic Jaffe method in KORA F4. | 1. Baumeister SE, Böger CA, Krämer BK, Doring A, Eheberg D, Fischer B, John J, Koenig W & Meisinger C: Effect of chronic kidney disease and comorbid conditions on health care costs: A 10-year observational study in a general population. <i>Am J Nephrol</i> 31: 222-229.<br>2. Wichmann HE, Gieger C & Illig T: KORA-gen--resource for population genetics, controls and a broad spectrum of disease phenotypes. <i>Gesundheitswesen</i> 67 Suppl 1: S26-30, 2005. |
| LIFELINES | 3-generations, population-based | 8085 | <b>Study exclusions or disease enrichment:</b> living outside the 3 Northern provinces of The Netherlands. <b>Exclusions:</b> none. | Urinary albumin and creatinine were measured using the Roche Modular.                                                                                                                                                                                                     | Stolk RP, Rosmalen JGM, Postma DS, de Boer RA, Navis G, Slaets JPJ, Ormel J, and Wolffenbuttel BHR. Universal risk factors for multifactorial diseases: LifeLines: a three-generation population-based study. <i>Eur. J. Epidemiol.</i> , vol. 23, no. 1, pp. 67-74, Jan. 2008.                                                                                                                                                                                         |
| MESA      | Community-based cohort study    | 2511 | <b>Study exclusions or disease enrichment:</b> none. <b>Exclusions:</b> none.                                                       | Urine albumin and creatinine were measured at the Clinical Chemistry Laboratory at Fletcher Allen Health Care (Burlington, Vt). Urine albumin and creatinine were measured by nephelometry and the rate Jaffe reaction, respectively.                                     | Bild DE et al. Multi-ethnic study of atherosclerosis: objectives and design. <i>Am J Epidemiol</i> 156, 871-81 (2002).                                                                                                                                                                                                                                                                                                                                                  |

SUPPLEMENTARY DATA

|         |                                                                  |      |                                                                                                                                                                                                                                                                     |                                                                                                                                                                                                                                                                                                                                                                                                                                    |                                                                                                                                                                                                                                                                                                                                                                                                                                                                                                                                                                                                                                                                                           |
|---------|------------------------------------------------------------------|------|---------------------------------------------------------------------------------------------------------------------------------------------------------------------------------------------------------------------------------------------------------------------|------------------------------------------------------------------------------------------------------------------------------------------------------------------------------------------------------------------------------------------------------------------------------------------------------------------------------------------------------------------------------------------------------------------------------------|-------------------------------------------------------------------------------------------------------------------------------------------------------------------------------------------------------------------------------------------------------------------------------------------------------------------------------------------------------------------------------------------------------------------------------------------------------------------------------------------------------------------------------------------------------------------------------------------------------------------------------------------------------------------------------------------|
| MICROS  | Cross-sectional, population-based study using extended pedigrees | 504  | <b>Study exclusions or disease enrichment:</b> <18 years of age. <b>Exclusions:</b> samples with overall SNP call rate < 95%, showing excess of heterozygosity, or being classified as outliers by IBS clustering analysis were excluded prior to further analyses. | The urinary albumin-to-creatinine ratio was measured on a point-of-care diabetes management platform (Bayer DCA 2000+ analyzer).                                                                                                                                                                                                                                                                                                   | 1. Pattaro C, Marroni F, Riegler A, Mascalzoni D, Pichler I, Volpato CB, Dal Cero U, De Grandi A, Egger C, Eisendle A, Fuchsberger C, Gögele M, Pedrotti S, Pinggera GK, Stefanov SA, Vogl FD, Wiedermann CJ, Meitinger T, Pramstaller PP. The genetic study of three population microisolates in South Tyrol (MICROS): study design and epidemiological perspectives. <i>BMC Med Genet.</i> 2007;8:29.<br>2. Marroni F, Grazio D, Pattaro C, Devoto M, Pramstaller P. Estimates of genetic and environmental contribution to 43 quantitative traits support sharing of a homogeneous environment in an isolated population from South Tyrol, Italy. <i>Hum Hered.</i> 2008;65(3):175-82. |
| PREVEND | Population-based                                                 | 3634 | <b>Study exclusions or disease enrichment:</b> aged between 28-75 yrs, enriched for microalbuminuria. <b>Exclusions:</b> none.                                                                                                                                      | Urinary albumin was determined from fresh urine samples by nephelometry (BNII; Dade Behring Diagnostic, Marburg, Germany). Intra- and inter-assay coefficients of variation were 2.2 and 2.6%, respectively.                                                                                                                                                                                                                       | Hillege HL, Fidler V, Diercks GFH, van Gilst WH, de Zeeuw D, van Veldhuisen DJ, Gans ROB, Janssen WMT, Grobbee DE, and de Jong PE. Urinary albumin excretion predicts cardiovascular and noncardiovascular mortality in general population. <i>Circulation</i> , vol. 106, no. 14, pp. 1777–82, Oct. 2002.                                                                                                                                                                                                                                                                                                                                                                                |
| SHIP    | Prospective population-based                                     | 2655 | <b>Study exclusions or disease enrichment:</b> none. <b>Exclusions:</b> sample call rate < 92%, duplicate samples (by IBS estimation), individuals with reported / genotyped gender mismatch.                                                                       | Urinary albumin was measured from spot first morning void urine by nephelometry (BNII, Dade Behring Diagnostica, Marburg, Germany). Intra-assay and interassay coefficients of variation were 4.3% and 4.4%, respectively. Urinary creatinine concentration was measured using Kodak Ektachem dry chemistry (Eastman Kodak, Rochester, NY). Intra-assay and interassay coefficients of variation were 0.9% and 2.9%, respectively. | 1. John U et al. Study of Health in Pomerania (SHIP). A health examination in an east German region: objectives and design. <i>Soz Praventivmed</i> 46:186-194, 2001.<br>2. Völzke H et al. Cohort Profile: The Study of Health in Pomerania. <i>Int J Epidemiol</i> , vol. 40, no. 2, pp. 294–307, Apr. 2011.                                                                                                                                                                                                                                                                                                                                                                            |

SUPPLEMENTARY DATA

|                          |                              |      |                                                                                                                                                                                                                                                                                                                                                                                           |                                                                                                                                                                                                                                                                                                        |                                                                                                                                                                                                                                                                                                                                                                                                                                                                                                                                                                                                                                                                                                                             |
|--------------------------|------------------------------|------|-------------------------------------------------------------------------------------------------------------------------------------------------------------------------------------------------------------------------------------------------------------------------------------------------------------------------------------------------------------------------------------------|--------------------------------------------------------------------------------------------------------------------------------------------------------------------------------------------------------------------------------------------------------------------------------------------------------|-----------------------------------------------------------------------------------------------------------------------------------------------------------------------------------------------------------------------------------------------------------------------------------------------------------------------------------------------------------------------------------------------------------------------------------------------------------------------------------------------------------------------------------------------------------------------------------------------------------------------------------------------------------------------------------------------------------------------------|
| SHIP-TREND               | Prospective population-based | 985  | <b>Study exclusions or disease enrichment:</b> this analysis concerns the subset of 988 individuals with genotype information. <b>Exclusions:</b> sample call rate < 94%, duplicate samples (by IBS estimation), individuals with reported/genotyped gender mismatch.                                                                                                                     | In a sample of spot urine, both the urinary albumin (intra-assay CV 4.5-7.6% for 1.0-24.5 mg/dl) and creatinine (Jaffe method, intra-assay CV 1.4-2.1% for 5.7-14.6 mmol/l) were measured on a Siemens Dimension Vista 1500 analyzer (Siemens Healthcare Diagnostics, Marburg, Germany), respectively. | 1. John U et al. Study of Health in Pomerania (SHIP). A health examination in an east German region: objectives and design. <i>Soz Praventivmed</i> 46:186-194, 2001.<br>2. Völzke H et al. Cohort Profile: The Study of Health in Pomerania. <i>Int J Epidemiol</i> , vol. 40, no. 2, pp. 294–307, Apr. 2011.                                                                                                                                                                                                                                                                                                                                                                                                              |
| <b>Replication study</b> |                              |      |                                                                                                                                                                                                                                                                                                                                                                                           |                                                                                                                                                                                                                                                                                                        |                                                                                                                                                                                                                                                                                                                                                                                                                                                                                                                                                                                                                                                                                                                             |
| ESTHER                   | Prospective study            | 2958 | <b>Study exclusions or disease enrichment:</b> study participants were required to be ≥50 year old and having a good knowledge of the German language. <b>Exclusions:</b> samples with insufficient amount of DNA for genotyping.                                                                                                                                                         | Urinary albumin concentration was measured using nephelometric method (Siemens. Marburg, Germany). The urinary creatinine levels were photometrically measured using the modified kinetic Jaffe method (Greiner Diagnostic GmbH. Bahlingen, Germany).                                                  | 1. Raum E, Rothenbacher D, Low M, Stegmaier C, Ziegler H, Brenner H. Changes of cardiovascular risk factors and their implications in subsequent birth cohorts of older adults in Germany: a life course approach. <i>Eur J Cardiovasc Prev Rehabil</i> 2007;14:809-814.<br>2. Schottker B, Haug U, Schomburg L, et al. Strong associations of 25-hydroxyvitamin D concentrations with all-cause, cardiovascular, cancer, and respiratory disease mortality in a large cohort study. <i>Am J Clin Nutr</i> 2013.<br>3. Weck MN, Stegmaier C, Rothenbacher D et al. Epidemiology of chronic atrophic gastritis: population-based study among 9444 older adults from Germany. <i>Aliment Pharmacol Ther.</i> 2007;26:879-887. |
| GANI_MED                 | Cohort study                 | 1674 | <b>Study exclusions or disease enrichment:</b> six main cohorts: heart failure, stroke, periodontal disease, renal insufficiency, metabolic syndrome, and fatty liver disease. <b>Exclusions:</b> sample call rate < 94%, heterozygosity rate > 6SD (MAF > 1%), PCA outliers (EV 1-4 > 8SD), duplicate samples (by IBS estimation), individuals with reported/genotyped gender mismatch.. | In a sample of spot urine, the urinary albumin was measured on a Siemens Dimension Vista 1500 analyzer (Siemens Healthcare Diagnostics, Marburg, Germany). Urinary creatinine was measured either by an enzymatic or Jaffe method, whereas the analyses were adjusted accordingly for the method used. | Grabe HJ, Assel H, Bahls T et al. Cohort profile: Greifswald approach to individualized medicine (GANI_MED). <i>J. Transl. Med.</i> 2014; 12: 144.                                                                                                                                                                                                                                                                                                                                                                                                                                                                                                                                                                          |

SUPPLEMENTARY DATA

|                 |                              |      |                                                                                                                                                                                                                                                                                                                                                                                                                                                                                                                                   |                                                                                                                                                                                                                                                                           |                                                                                                                                                                                                                                                                                                                                                                                                                                                                 |
|-----------------|------------------------------|------|-----------------------------------------------------------------------------------------------------------------------------------------------------------------------------------------------------------------------------------------------------------------------------------------------------------------------------------------------------------------------------------------------------------------------------------------------------------------------------------------------------------------------------------|---------------------------------------------------------------------------------------------------------------------------------------------------------------------------------------------------------------------------------------------------------------------------|-----------------------------------------------------------------------------------------------------------------------------------------------------------------------------------------------------------------------------------------------------------------------------------------------------------------------------------------------------------------------------------------------------------------------------------------------------------------|
| GENDIAN         | Cohort study                 | 450  | <b>Study exclusions or disease enrichment:</b> study on type 2 diabetes patients.<br><b>Exclusions:</b> of the 1,026 subjects undergoing genotyping, 53 were excluded due to call-rate < 95% (n=22), relatedness and duplicates (n=11), gender mismatch (n=16), ethnicity check (n=4); in addition, we excluded the following patients for the current analysis of cross-sectional UACR: patients with end-stage renal disease (n=438) or advanced, histologically proven diabetic nephropathy (n=84) or missing phenotype (n=1). | Urinary creatinine was measured using an enzymatic assay, urinary albumin was measured using the Roche Tina Quant assay.                                                                                                                                                  | 1. Böger CA et al: effect of ACE and AT-2 inhibitors on mortality and progression to microalbuminuria in a nested case control study of diabetic nephropathy in diabetes mellitus type 2: results from the GENDIAN study. Int J Clin Pharmacol Ther 2006;44:364-74.<br>2. Böger CA et al. Association of eGFR-related loci identified by GWAS with incident CKD and ESRD. Plos Genet 2011;7:e1002292.                                                           |
| KORAF4 non-GWAS | Prospective population-based | 1195 | <b>Study exclusions or disease enrichment:</b> none. <b>Exclusions:</b> none.                                                                                                                                                                                                                                                                                                                                                                                                                                                     | Using stored urine samples, urinary albumin concentration was measured with a latex enhanced nephelometric assay (Siemens Healthcare Diagnostics) on a Dade Behring BN2 apparatus. Urinary creatinine concentration was measured using an enzymatic method.               | 1. Baumeister SE, Böger CA, Krämer BK, Doring A, Eheberg D, Fischer B, John J, Koenig W & Meisinger C: Effect of chronic kidney disease and comorbid conditions on health care costs: A 10-year observational study in a general population. Am J Nephrol 31: 222-229, 2010.<br>2. Wichmann HE, Gieger C & Illig T: KORA-gen--resource for population genetics, controls and a broad spectrum of disease phenotypes. Gesundheitswesen 67 Suppl 1: S26-30, 2005. |
| KORAF3 non-GWAS | Prospective population-based | 1389 | <b>Study exclusions or disease enrichment:</b> none. <b>Exclusions:</b> none.                                                                                                                                                                                                                                                                                                                                                                                                                                                     | Using stored urine samples, urinary albumin concentration was measured with a latex enhanced nephelometric assay (Siemens Healthcare Diagnostics) on a Dade Behring BN2 apparatus. Urinary creatinine concentration was measured using a kinetic Jaffe method in KORA F4. | 1. Baumeister SE, Böger CA, Krämer BK, Doring A, Eheberg D, Fischer B, John J, Koenig W & Meisinger C: Effect of chronic kidney disease and comorbid conditions on health care costs: A 10-year observational study in a general population. Am J Nephrol 31: 222-229, 2010.<br>2. Wichmann HE, Gieger C & Illig T: KORA-gen--resource for population genetics, controls and a broad spectrum of disease phenotypes. Gesundheitswesen 67 Suppl 1: S26-30, 2005. |

SUPPLEMENTARY DATA

|                  |                                               |      |                                                                                                                                                                                                                                                                                                                                      |                                                                                                                                                                                                                                                |                                                                                                                                                                                                                                                                                                                                                                                                                                                                                                                                                                                                            |
|------------------|-----------------------------------------------|------|--------------------------------------------------------------------------------------------------------------------------------------------------------------------------------------------------------------------------------------------------------------------------------------------------------------------------------------|------------------------------------------------------------------------------------------------------------------------------------------------------------------------------------------------------------------------------------------------|------------------------------------------------------------------------------------------------------------------------------------------------------------------------------------------------------------------------------------------------------------------------------------------------------------------------------------------------------------------------------------------------------------------------------------------------------------------------------------------------------------------------------------------------------------------------------------------------------------|
| SAPHIR           | Healthy working population                    | 1690 | <b>Study exclusions or disease enrichment:</b> none. <b>Exclusions:</b> none.                                                                                                                                                                                                                                                        | Urinary creatinine was measured using a modified kinetic Jaffe reaction (CREA, Roche Diagnostics GmbH, Mannheim, Germany). Urinary albumin concentration was determined using the Tinaquant assay (Roche Diagnostics GmbH, Mannheim, Germany). | 1. Heid IM, Wagner SA, Gohlke H, Iglseider B, Mueller JC, Cip P, Ladurner G, Reiter R, Stadlmayr A, Mackevics V, Illig T, Kronenberg F, Paulweber B: Genetic architecture of the APM1 gene and its influence on adiponectin plasma levels and parameters of the metabolic syndrome in 1,727 healthy Caucasians. <i>Diabetes</i> 55:375-384, 2006.<br>2. Kollerits B, Coassin S, Kiechl S, Hunt SC, Paulweber B, Willeit J, Brandstätter A, Lamina C, Adams TD, Kronenberg F: A common variant in the adiponutrin gene influences liver enzyme levels. <i>Journal of Medical Genetics</i> 47:116-119, 2010. |
| SKIPOGH          | Cross-sectional family-based population-based | 807  | <b>Study exclusions or disease enrichment:</b> none. <b>Exclusions:</b> of the 941 participants who underwent genotyping, we excluded 71 participants with call rate < 90%, resulting in a total of 870 genotyped individuals.                                                                                                       | Urinary creatinine was measured using an IDMS-traceable Jaffe kinetic compensated method. Urinary albumin concentration was measured using a quantitative immuno-nephelometry.                                                                 | Pruijm M, Ponte B, Ackermann D, Vuistiner P, Paccaud F, Guessous I, Ehret G, Eisenberger U, Mohaupt M, Burnier M, Martin PY, Bochud M. <i>Eur Radiol.</i> 2013 May 28. [Epub ahead of print].                                                                                                                                                                                                                                                                                                                                                                                                              |
| Vanderbilt Omni1 | Practice-based cohort                         | 472  | <b>Study exclusions or disease enrichment:</b> samples chosen based on being a case or control for one of 31 pharmacogenetic analyses. <b>Exclusions:</b> individuals of non-white ancestry in the electronic medical record. Also excluded any lab measurements of individuals after initiation of dialysis or a kidney transplant. | The urinary albumin concentration was measured using turbidimetric immunoassay with endpoint determination. Urinary creatinine levels were measured using the modified Jaffé method.                                                           |                                                                                                                                                                                                                                                                                                                                                                                                                                                                                                                                                                                                            |
| Vanderbilt Omni5 | Practice-based cohort                         | 144  | <b>Study exclusions or disease enrichment:</b> samples chosen based on being a case or control for one of 31 pharmacogenetic analyses. <b>Exclusions:</b> individuals of non-white ancestry in the electronic medical record. Also excluded any lab measurements of individuals after initiation of dialysis or a kidney transplant. | The urinary albumin concentration was measured using turbidimetric immunoassay with endpoint determination. Urinary creatinine levels were measured using the modified Jaffé method.                                                           |                                                                                                                                                                                                                                                                                                                                                                                                                                                                                                                                                                                                            |

SUPPLEMENTARY DATA

|                                        |                                        |      |                                                                                                                                                                                                                                                                                                                                                                                                                                                                                                                                                                                                                         |                                                                                                                                                                                      |                                                                                                                                                                                                                                                                                                                                                                                                                                                                                                                                                                                                         |
|----------------------------------------|----------------------------------------|------|-------------------------------------------------------------------------------------------------------------------------------------------------------------------------------------------------------------------------------------------------------------------------------------------------------------------------------------------------------------------------------------------------------------------------------------------------------------------------------------------------------------------------------------------------------------------------------------------------------------------------|--------------------------------------------------------------------------------------------------------------------------------------------------------------------------------------|---------------------------------------------------------------------------------------------------------------------------------------------------------------------------------------------------------------------------------------------------------------------------------------------------------------------------------------------------------------------------------------------------------------------------------------------------------------------------------------------------------------------------------------------------------------------------------------------------------|
| Vanderbilt 660W                        | Practice-based cohort                  | 365  | <b>Study exclusions or disease enrichment:</b> samples chosen for normal cardiac conduction, meaning that at some point in time they had a normal electrocardiogram without the presence of heart disease, arrhythmias, or electrocardiographically-active medications. <b>Exclusions:</b> children (age <18) and individuals of non-white ancestry in the electronic medical record. Also excluded any lab measurements from individuals after initiation of dialysis or a kidney transplant. At some point in their electronic medical record, the patients were absent of heart disease, but could later develop it. | The urinary albumin concentration was measured using turbidimetric immunoassay with endpoint determination. Urinary creatinine levels were measured using the modified Jaffé method. | Denny JC, Ritchie MD, Crawford DC, Schildcrout JS, Ramirez AH, Pulley JM, Basford MA, Masys DR, Haines JL, Roden DM. Identification of genomic predictors of atrioventricular conduction: Using electronic medical records as a tool for genome science. <i>Circulation</i> 2010;122(20):2016-21.                                                                                                                                                                                                                                                                                                       |
| <b>Clinical characterization study</b> |                                        |      |                                                                                                                                                                                                                                                                                                                                                                                                                                                                                                                                                                                                                         |                                                                                                                                                                                      |                                                                                                                                                                                                                                                                                                                                                                                                                                                                                                                                                                                                         |
| DCCT/EDIC                              | Trial of patients with type I diabetes | 1304 | <b>Study exclusions or disease enrichment:</b> individuals with insulin-dependent type I diabetes mellitus between 1 and 15 years of duration, age 13-39 years at enrolment, free of advanced diabetes-related complications, absence of several comorbidities. <b>Exclusions:</b> Subjects meeting the criteria for persistent microalbuminuria at DCCT baseline and DCCT year 1 (n = 60) were excluded from the analyses of the time to incident albuminuria. Analyses were restricted to individuals of European ancestry.                                                                                           | The urinary albumin concentration was measured from times urine samples using a solid-phase fluoroimmunoassay. Urinary creatinine levels were measured using the Jaffé method.       | <ol style="list-style-type: none"> <li>1. The Diabetes Control and Complications (DCCT) Research Group. Effect of intensive therapy on the development and progression of diabetic nephropathy in the Diabetes Control and Complications Trial. <i>Kidney Int</i> 1995;47(6):1703–20.</li> <li>2. de Boer IH et al. Long-term renal outcomes of patients with type 1 diabetes mellitus and microalbuminuria: an analysis of the Diabetes Control and Complications Trial/Epidemiology of Diabetes Interventions and Complications cohort. <i>Arch Intern Med.</i> 2011 Mar 14;171(5):412-20.</li> </ol> |

SUPPLEMENTARY DATA

**Supplementary Table 3: Study-specific information about genotyping, imputation and data management and analysis**

| Study Name           | Genotyping Array type             | Genotype calling algorithm | QC filters for genotyped SNPs used for imputation (listed are criteria for exclusion)                                                      | No of SNPs used for imputation | Imputation software, version | Imputation Backbone (NCBI build)                                                                    | Filtering of imputed genotypes | Data management and statistical analysis                       |
|----------------------|-----------------------------------|----------------------------|--------------------------------------------------------------------------------------------------------------------------------------------|--------------------------------|------------------------------|-----------------------------------------------------------------------------------------------------|--------------------------------|----------------------------------------------------------------|
| <b>3C</b>            | Illumina Human610-Quad            | BeadStudio                 | call rate < 98%, pHWE < 10E-6, MAF < 1%                                                                                                    | 492,897                        | MACH                         | 1000 Genomes EUR, Dec 2010 (Build 37)                                                               | none                           | R and ProbABEL                                                 |
| <b>Advance</b>       | Affymetrix 5.0<br>Affymetrix 6.0  | Affymetrix                 | SNPs genotyped on Affymetrix 5.0: call rate < 96% (<99% if MAF < 5%); SNPs genotyped on Affymetrix 6.0: call rate < 97% (<99% if MAF < 5%) | 876,688                        | IMPUTE2 2.1.2                | 1000 Genomes CEU Pilot, Jun 2010 plus HapMap 3 rel. 2 all available haplotypes, Feb 2009 (build 36) | imputation info < 0.5          | SNPTEST                                                        |
| <b>AGES</b>          | Illumina Hu370CNV                 | Illumina                   | call rate < 97%, pHWE < 1e-6, MAF < 0.01, mishap p < 1e-9, SNPs not in Hapmap or strandedness issues merging with Hapmap                   | 329,804                        | MACH 1.0.16                  | HapMap rel. 22 (build 36)                                                                           | none                           | R, ProbABEL, Linear and Logistic Regression                    |
| <b>Amish</b>         | Affymetrix 500K                   | BRLMM                      | call rate < 95%, pHWE < 10E-6, MAF < 1%, non-HapMap                                                                                        | 338,598                        | MACH 1.0.15                  | HapMap rel. 22 phased CEU haplotypes (build 36)                                                     | none                           | Measured genotype accounting for polygenic component           |
| <b>ARIC</b>          | Affymetrix 6.0                    | Birdseed                   | call rate < 95%, pHWE < 10E-5, MAF < 1%                                                                                                    | 669,450                        | MACH 1.0.16                  | HapMap rel. 22 (build 36)                                                                           | none                           | ProbABEL, PLINK, R                                             |
| <b>BLSA</b>          | Illumina Infinium HumanHap 550K   | Beadstudio                 | call rate < 99%, pHWE < 10E-4, MAF < 1%                                                                                                    | 501,764                        | MACH 1.0.15                  | HapMap rel. 21 phased CEU haplotypes (build 35)                                                     | MAF < 1%, r2hat < 0.3          | SAS, Merlin, R                                                 |
| <b>CHS</b>           | Illumina 370CNV                   | BeadStudio                 | call rate < 97%, pHWE < 10E-5, heterozygotes=0, SNP not in HapMap                                                                          | 306,655                        | BimBam 0.99                  | HapMap rel. 22 (build 36)                                                                           | dosage variance < 0.01         | Linear and logistic regression using R, robust estimates of SE |
| <b>COLAUS</b>        | Affymetrix 500K                   | BRLMM                      | call rate < 70%, pHWE < 10E-7                                                                                                              | 390,631                        | IMPUTE 0.2.0                 | HapMap rel. 21 (build 35)                                                                           | none                           | Matlab                                                         |
| <b>CROATIA-SPLIT</b> | HAP370CNV                         | Illumina                   | call rate < 98%, pHWE < 10E-10                                                                                                             | 330,997                        | MACH 1.0.15                  | HapMap rel. 22 CEU haplotypes (build 36)                                                            | none                           | R (GenABEL, ProABEL)                                           |
| <b>EPIC</b>          | Affymetrix 500K                   | BRLMM                      | call rate < 90%, pHWE < 10e-6                                                                                                              | 382,037                        | IMPUTE 0.3.1                 | HapMap rel. 21 (Build 35)                                                                           | none                           | SAS, Stata, Linux scripts                                      |
| <b>Fenland</b>       | Affymetrix 500K                   | BRLMM                      | call rate < 90%, pHWE < 10E-6, MAF < 1%                                                                                                    | 362,055                        | IMPUTE 0.4.2                 | HapMap rel. 22 (build 36)                                                                           | proper_info < 0.4              | Linux, Stata 10.1, SNPTEST 1.1.5                               |
| <b>FHS</b>           | Affymetrix 500K<br>Affymetrix 50K | Affymetrix                 | call rate < 95%, pHWE < 10E-6                                                                                                              | 503,526                        | MACH 1.0.15                  | HapMap rel. 22 phased CEU haplotypes (build 36)                                                     | none                           | R                                                              |

SUPPLEMENTARY DATA

|                                     |                                                       |                  |                                                                                                                                                                                                                                       |           |                                  |                                                 |                                        |                                                                  |
|-------------------------------------|-------------------------------------------------------|------------------|---------------------------------------------------------------------------------------------------------------------------------------------------------------------------------------------------------------------------------------|-----------|----------------------------------|-------------------------------------------------|----------------------------------------|------------------------------------------------------------------|
|                                     | supplemental                                          |                  |                                                                                                                                                                                                                                       |           |                                  |                                                 |                                        |                                                                  |
| <b>INCIPE</b>                       | Illumina                                              | Illumina         | call rate < 95%, pHWE < 10E-6                                                                                                                                                                                                         | 635,646   | IMPUTE 0.2.0                     | HapMap rel. 22 phased CEU haplotypes (build 36) | none                                   | R                                                                |
| <b>KORA-F3</b>                      | Affymetrix 500K                                       | BRLMM            | per-chip call rate < 93%, MAF < 5%, discrepancy for one of the 50 SNPs common on both chips, gender checks                                                                                                                            | 380,407   | MACH                             | HapMap rel. 22 (build 35)                       | none                                   | MACH2QTL, ProbABEL, R, Visual Basic                              |
| <b>KORA-F4</b>                      | Affymetrix 6.0                                        | BRLMM            | per-chip call rate < 93%, per SNP call rate < 93%, MAF < 1%, gender checks                                                                                                                                                            | 629,893   | MACH                             | HapMap rel. 22 (build 36)                       | none                                   | MACH2QTL, ProbABEL, R, Visual Basic                              |
| <b>LIFELINES</b>                    | Illumina CytoSNP12 v2                                 | GenomeStudio     | call rate < 95%, pHWE < 1E-05                                                                                                                                                                                                         | 257,581   |                                  | HapMap rel. 22 phased CEU haplotypes (build 36) | none                                   | NO                                                               |
| <b>MESA</b>                         | Affymetrix Genome-Wide Human SNP Array 6.0            | Birdseed v2      | call rate < 95%, MAF ≤ 1%                                                                                                                                                                                                             | 897,979   | IMPUTE 2.1.0                     | HapMap rel. 22 phased CEU haplotypes (build 36) | none                                   | PLINK                                                            |
| <b>MICROS</b>                       | Illumina Infinium HumanHap300 v2 SNP bead microarrays | Beadstudio       | call rate < 98%, pHWE < 10E-6, MAF < 1%                                                                                                                                                                                               | 292,917   | MACH 1.0.16                      | HapMap rel. 22 (build 36)                       | none                                   | R, GenABEL, ProbABEL;                                            |
| <b>PREVEND</b>                      | Illumina CytoSNP12 v2                                 | GenomeStudio     | call rate < 95%, pHWE < 1E-05                                                                                                                                                                                                         | 232,571   |                                  | HapMap rel. 22 phased CEU haplotypes (build 36) | none                                   | NO                                                               |
| <b>SHIP</b>                         | Affymetrix 6.0                                        | Birdseed2        | none                                                                                                                                                                                                                                  | 869,224   | IMPUTE 0.5.0                     | HapMap rel. 22 (build 36)                       | none                                   | SNPTEST 1.1.5, QUICKTEST 0.94, R, InforSense, InterSystems Caché |
| <b>SHIP-TREND</b>                   | Illumina Human Omni 2.5                               | GenomeStudio     | call rate ≤ 0.9, pHWE ≤ 1E-04, monomorphic SNPs                                                                                                                                                                                       | 1,782,967 | IMPUTE 2.1.2.3                   | HapMap rel. 22 phased CEU haplotypes (build 36) | duplicate RSID but different positions | QUICKTEST 0.95, R, InforSense, InterSystems Caché                |
| <b><i>in silico replication</i></b> |                                                       |                  |                                                                                                                                                                                                                                       |           |                                  |                                                 |                                        |                                                                  |
| <b>GANI_MED</b>                     | Illumina Infinium PsychArray                          | GenomeStudio     | call rate ≤ 0.95, pHWE ≤ 1E-04, MAF ≤ 0.005                                                                                                                                                                                           | 305,145   | IMPUTE 2.3.1                     | 1000 Genomes Phase I v3 ALL (macGT1) (build 37) | duplicate IDs (via positions)          | R, PLINK, gtool, InterSystems Caché                              |
| <b>GENDIAN</b>                      | Genome-Wide Human SNP Array 6.0                       | Birdseed (BRLMM) | n=126,259 SNPs (chr 1-chr22, chr X) were excluded from imputation by SNP QC due to one of the following: HWE-p < 10-6; monomorphic SNPs; MAF>.1 & call rate<.9 MAF>.09 & MAF <=.1 & call rate<.91 MAF>.08 & MAF <=.09 & call rate<.92 | 747,402   | MACH 1.0.18.c MiniMac 2012-10-09 | GIANT ALL 1000G v3 ref panel GRCh (build 37)    | none                                   | R                                                                |



SUPPLEMENTARY DATA

|                            |                                                                  |                                           |                                                                                                                                                                                                                                                                                                            |                                                                                                 |                                                                |                                                                                                                                                                    |                          |             |
|----------------------------|------------------------------------------------------------------|-------------------------------------------|------------------------------------------------------------------------------------------------------------------------------------------------------------------------------------------------------------------------------------------------------------------------------------------------------------|-------------------------------------------------------------------------------------------------|----------------------------------------------------------------|--------------------------------------------------------------------------------------------------------------------------------------------------------------------|--------------------------|-------------|
|                            |                                                                  |                                           | MAF>.07 & MAF <=.08 & call rate<.93<br>MAF>.06 & MAF <=.07 & call rate<.94<br>MAF>.05 & MAF <=.06 & call rate<.95<br>MAF>.04 & MAF <=.05 & call rate<.96<br>MAF>.03 & MAF <=.04 & call rate<.97<br>MAF>.02 & MAF <=.03 & call rate<.98<br>MAF>.01 & MAF <=.02 & call rate<.99<br>MAF <=.01 & call rate<.99 |                                                                                                 |                                                                |                                                                                                                                                                    |                          |             |
| <b>Vanderbilt Omni1</b>    | Illumina HumanOmni1-Quad                                         | BeadStudio                                | call rate < 98%, IBD (Z0<0.8), Mendel errors > 0, Duplicate concordance < 100%                                                                                                                                                                                                                             | 946,523                                                                                         | IMPUTE 2.3.0                                                   | 1000 Genomes Phase 1 integrated v3                                                                                                                                 | Genotype Likelihood <0.9 | Plink and R |
| <b>Vanderbilt Omni5</b>    | Illumina HumanOmni5-Quad                                         | BeadStudio                                | call rate < 98%, IBD (Z0<0.8), Mendel errors > 0, Duplicate concordance < 100%                                                                                                                                                                                                                             | 3,819,154                                                                                       | IMPUTE 2.3.0                                                   | 1000 Genomes Phase 1 integrated v3                                                                                                                                 | Genotype Likelihood <0.9 | Plink and R |
| <b>Vanderbilt 660W</b>     | Illumina Human660W-Quad                                          | BeadStudio                                | call rate < 98%, IBD (Z0<0.8), Mendel errors > 0, Duplicate concordance < 100%                                                                                                                                                                                                                             | 530,014                                                                                         | IMPUTE 2.3.0                                                   | 1000 Genomes Phase 1 integrated v3                                                                                                                                 | Genotype Likelihood <0.9 | Plink and R |
| <b>de novo replication</b> |                                                                  |                                           |                                                                                                                                                                                                                                                                                                            |                                                                                                 |                                                                |                                                                                                                                                                    |                          |             |
|                            | <b>genotyping platform</b>                                       | <b>amount of DNA used per SNP (in ng)</b> | <b>genotyping method</b>                                                                                                                                                                                                                                                                                   | <b>n duplicates and concordance per SNP (provide per individual SNP)</b>                        | <b>number attempted /number genotyped (per individual SNP)</b> | <b>Other QC indices that your lab uses</b>                                                                                                                         |                          |             |
| <b>ESTHER</b>              | LGC genomics SNP-line, using KASP Chemistry and 1536-well plates | 3.75                                      | De novo genotyping using KASPar v4.0 after whole genome amplification by primer extension preamplification (PEP) using thermostable DNA polymerases                                                                                                                                                        | LGC Genomics does not add duplicates. The data for each SNP represents one reaction per sample. | call rate range 0.98 - 1                                       | none indicated by the lab                                                                                                                                          |                          |             |
| <b>SKIPOGH</b>             | LGC genomics SNP-line, using KASP Chemistry and 1536-well plates | 5 -7.5                                    | De novo genotyping using KASPar v4.0 after whole genome amplification by primer extension preamplification (PEP) using thermostable DNA polymerases                                                                                                                                                        | 29 participants were genotyped in duplicate. SNP concordance                                    | SNP call rates varied from 94.5% to 99.5% (median 97.2)        | All assays have been validated on an in-house DNA panel (44 random Caucasian DNA samples). All sample plates genotyped include at least two negative controls. ie. |                          |             |

SUPPLEMENTARY DATA

|                        |                              |    |            |                                                                                                               |                                                                                         |                                                                                                                                                                                                                                                                          |  |  |
|------------------------|------------------------------|----|------------|---------------------------------------------------------------------------------------------------------------|-----------------------------------------------------------------------------------------|--------------------------------------------------------------------------------------------------------------------------------------------------------------------------------------------------------------------------------------------------------------------------|--|--|
|                        |                              |    |            | varied between 86% and 100%.                                                                                  |                                                                                         | blank/water controls. All genotyping data are initially generated by an automated algorithm (genotype calling based upon recorded fluorescence values). All genotyping data is manually checked and verified by no less than two experienced scientists at LGC genomics. |  |  |
| <b>KORAF4 non-GWAS</b> | Mass ARRAY Analyzer 4 system | 15 | iPlex Gold | At least 15% duplicate genotyping per SNP. Concordance $\geq 95\%$ , median = 100%                            | NA                                                                                      | NA                                                                                                                                                                                                                                                                       |  |  |
| <b>KORAF3 non-GWAS</b> | Mass ARRAY Analyzer 4 system | 15 | iPlex Gold | At least 15% duplicate genotyping per SNP. Concordance $\geq 95\%$ , median = 100%                            | NA                                                                                      | NA                                                                                                                                                                                                                                                                       |  |  |
| <b>SAPHIR</b>          | Mass ARRAY Analyzer 4 system | 15 | iPlex Gold | 70 duplicates; 46 SNPs were genotyped; 44 SNPs had a concordance of 100%; 2 SNPs had each 1 discordant sample | 46 SNPs were genotyped and had an average callrate of 99,3% (between 98.15% and 99.65%) | automatic calculation of the HWE, comparison of the obtained genotypes with HapMap Data                                                                                                                                                                                  |  |  |

SUPPLEMENTARY DATA

Supplementary Table 4: SNPs associated with UACR among all individuals with a p-value of <1E-05.

| SNPID      | chr | position (hg18) | Allele1 | Allele2 | Frequency Allele1 | Effect | SE    | p-value | I <sup>2</sup> % | Sample Size | In Gene | Genes Within 100kb                                                                                                                                                                                                                                                           |
|------------|-----|-----------------|---------|---------|-------------------|--------|-------|---------|------------------|-------------|---------|------------------------------------------------------------------------------------------------------------------------------------------------------------------------------------------------------------------------------------------------------------------------------|
| rs880315   | 1   | 10719453        | t       | c       | 0.65              | -0.042 | 0.009 | 9.1E-06 | 0                | 41333       | CASZ1   |                                                                                                                                                                                                                                                                              |
| rs4072037  | 1   | 153428691       | t       | c       | 0.54              | 0.029  | 0.006 | 2.5E-06 | 0                | 54450       | MUC1    | MIR92B(dist=2901),THBS3(dist=3312),TRIM46(dist=4620),KRTCAP2(dist=16263),MTX1(dist=16423),GBAP1(dist=21549),GBA(dist=42172),DPM3(dist=49071),SLC50A1(dist=50733),EFNA1(dist=54681),FAM189B(dist=54929),SCAMP3(dist=63703),CLK2(dist=70592),HCN3(dist=85151),PKLR(dist=97017) |
| rs914615   | 1   | 153442516       | a       | g       | 0.47              | -0.030 | 0.007 | 7.4E-06 | 0                | 44877       | THBS3   | MTX1(dist=2598),GBAP1(dist=7724),MIR92B(dist=10829),MUC1(dist=13186),TRIM46(dist=18445),GBA(dist=28347),KRTCAP2(dist=30088),FAM189B(dist=41104),SCAMP3(dist=49878),CLK2(dist=56767),DPM3(dist=62896),SLC50A1(dist=64558),EFNA1(dist=68506),HCN3(dist=71326),PKLR(dist=83192) |
| rs17346504 | 2   | 137640231       | t       | c       | 0.12              | 0.050  | 0.011 | 7.2E-06 | 27               | 53401       | THSD7B  |                                                                                                                                                                                                                                                                              |
| rs9333289  | 2   | 187206352       | t       | c       | 0.70              | -0.030 | 0.007 | 9.3E-06 | 24               | 54441       | ITGAV   | FAM171B(dist=60682)                                                                                                                                                                                                                                                          |
| rs9333290  | 2   | 187227583       | t       | g       | 0.30              | 0.038  | 0.008 | 7.5E-07 | 15               | 54441       | ITGAV   | FAM171B(dist=39451)                                                                                                                                                                                                                                                          |
| rs13006483 | 2   | 187230995       | t       | g       | 0.30              | 0.037  | 0.008 | 1.2E-06 | 15               | 54441       | ITGAV   | FAM171B(dist=36039)                                                                                                                                                                                                                                                          |
| rs3816386  | 2   | 187236880       | a       | g       | 0.69              | -0.035 | 0.007 | 2.9E-06 | 0                | 54441       | ITGAV   | FAM171B(dist=30154)                                                                                                                                                                                                                                                          |
| rs11685758 | 2   | 187241613       | t       | c       | 0.31              | 0.039  | 0.008 | 2.7E-06 | 0                | 44877       | ITGAV   | FAM171B(dist=25421)                                                                                                                                                                                                                                                          |
| rs12151442 | 2   | 187246092       | t       | c       | 0.70              | -0.030 | 0.007 | 5.5E-06 | 1                | 54441       | ITGAV   | FAM171B(dist=20942)                                                                                                                                                                                                                                                          |
| rs13001028 | 2   | 187255140       | a       | g       | 0.69              | -0.035 | 0.007 | 2.0E-06 | 0                | 54440       |         | ITGAV(dist=1266),FAM171B(dist=11894)                                                                                                                                                                                                                                         |
| rs13028817 | 2   | 187255744       | t       | g       | 0.70              | -0.029 | 0.007 | 7.3E-06 | 0                | 54439       |         | ITGAV(dist=1870),FAM171B(dist=11290)                                                                                                                                                                                                                                         |
| rs12615659 | 2   | 187259552       | a       | t       | 0.30              | 0.030  | 0.007 | 4.3E-06 | 2                | 54439       |         | ITGAV(dist=5678),FAM171B(dist=7482)                                                                                                                                                                                                                                          |
| rs11678190 | 2   | 187268553       | a       | c       | 0.69              | -0.036 | 0.007 | 1.5E-06 | 0                | 54441       | FAM171B | ITGAV(dist=14679)                                                                                                                                                                                                                                                            |
| rs17750683 | 2   | 187328542       | a       | t       | 0.68              | -0.033 | 0.007 | 4.1E-06 | 22               | 54439       | FAM171B | ZSWIM2(dist=71910),ITGAV(dist=74668)                                                                                                                                                                                                                                         |
| rs13026081 | 2   | 187334583       | t       | c       | 0.32              | 0.032  | 0.007 | 6.8E-06 | 21               | 54434       | FAM171B | ZSWIM2(dist=65869),ITGAV(dist=80709)                                                                                                                                                                                                                                         |
| rs11783652 | 8   | 55021047        | a       | g       | 0.32              | 0.037  | 0.008 | 2.4E-06 | 0                | 54450       | RGS20   | TCEA1(dist=20620)                                                                                                                                                                                                                                                            |
| rs17301329 | 8   | 55021534        | a       | t       | 0.29              | 0.042  | 0.008 | 5.6E-07 | 0                | 54450       | RGS20   | TCEA1(dist=20133),LYPLA1(dist=99946)                                                                                                                                                                                                                                         |
| rs16919699 | 8   | 55021582        | t       | c       | 0.66              | -0.037 | 0.008 | 2.3E-06 | 0                | 54450       | RGS20   | TCEA1(dist=20085),LYPLA1(dist=99898)                                                                                                                                                                                                                                         |
| rs1016013  | 9   | 96516305        | a       | g       | 0.42              | 0.028  | 0.006 | 6.4E-06 | 5                | 54450       |         | C9orf3(dist=12467),FBP1(dist=73953),MIR2278(dist=95760)                                                                                                                                                                                                                      |
| rs7851726  | 9   | 96543806        | t       | c       | 0.42              | 0.027  | 0.006 | 5.2E-06 | 3                | 54450       | C9orf3  | MIR2278(dist=68259)                                                                                                                                                                                                                                                          |
| rs446540   | 9   | 96549020        | a       | g       | 0.43              | 0.028  | 0.006 | 5.8E-06 | 10               | 54304       | C9orf3  | MIR2278(dist=63045)                                                                                                                                                                                                                                                          |
| rs183066   | 9   | 96557253        | t       | c       | 0.57              | -0.028 | 0.006 | 5.8E-06 | 9                | 54448       | C9orf3  | MIR2278(dist=54812)                                                                                                                                                                                                                                                          |
| rs2584806  | 9   | 96569099        | a       | c       | 0.58              | -0.027 | 0.006 | 9.3E-06 | 9                | 54449       | C9orf3  | MIR2278(dist=42966)                                                                                                                                                                                                                                                          |
| rs1109861  | 10  | 11286275        | a       | c       | 0.55              | -0.030 | 0.006 | 1.9E-06 | 5                | 54442       | CELF2   | CELF2-AS2(dist=98818)                                                                                                                                                                                                                                                        |
| rs1801239  | 10  | 16959058        | t       | c       | 0.90              | -0.066 | 0.011 | 4.6E-09 | 31               | 54450       | CUBN    | RSU1(dist=59599)                                                                                                                                                                                                                                                             |

SUPPLEMENTARY DATA

|             |    |          |   |   |      |        |       |         |    |       |                 |                                                                                                                                                                                                                                                                          |
|-------------|----|----------|---|---|------|--------|-------|---------|----|-------|-----------------|--------------------------------------------------------------------------------------------------------------------------------------------------------------------------------------------------------------------------------------------------------------------------|
| rs17343073  | 10 | 16972202 | a | t | 0.90 | -0.071 | 0.012 | 4.0E-09 | 22 | 54449 | <i>CUBN</i>     | RSU1(dist=72743)                                                                                                                                                                                                                                                         |
| rs6602163   | 10 | 17006772 | a | g | 0.84 | -0.056 | 0.009 | 1.2E-09 | 5  | 54450 | <i>CUBN</i>     |                                                                                                                                                                                                                                                                          |
| rs10795433* | 10 | 17009929 | a | c | 0.86 | -0.061 | 0.010 | 2.4E-10 | 6  | 54450 | <i>CUBN</i>     |                                                                                                                                                                                                                                                                          |
| rs2417849   | 12 | 20167780 | t | c | 0.37 | 0.028  | 0.006 | 9.5E-06 | 39 | 54441 |                 | LOC100506393(dist=24711)                                                                                                                                                                                                                                                 |
| rs2303658   | 12 | 20169697 | a | g | 0.34 | 0.030  | 0.007 | 9.5E-06 | 31 | 54442 |                 | LOC100506393(dist=26628)                                                                                                                                                                                                                                                 |
| rs11609944  | 12 | 20170557 | a | g | 0.38 | 0.028  | 0.006 | 9.6E-06 | 42 | 54449 |                 | LOC100506393(dist=27488)                                                                                                                                                                                                                                                 |
| rs1728897   | 15 | 53088662 | t | c | 0.54 | -0.028 | 0.006 | 4.1E-06 | 0  | 54433 |                 |                                                                                                                                                                                                                                                                          |
| rs12594729  | 15 | 53088684 | a | g | 0.50 | 0.029  | 0.006 | 2.0E-06 | 0  | 54450 |                 |                                                                                                                                                                                                                                                                          |
| rs7167661   | 15 | 53090751 | t | c | 0.54 | -0.028 | 0.006 | 3.5E-06 | 0  | 54450 |                 |                                                                                                                                                                                                                                                                          |
| rs11071163  | 15 | 53091242 | a | g | 0.50 | -0.029 | 0.006 | 9.2E-06 | 0  | 54449 |                 |                                                                                                                                                                                                                                                                          |
| rs7173577   | 15 | 53092295 | a | g | 0.45 | -0.029 | 0.006 | 2.3E-06 | 0  | 54450 |                 |                                                                                                                                                                                                                                                                          |
| rs1728867   | 15 | 53094106 | a | g | 0.45 | -0.030 | 0.006 | 8.3E-07 | 0  | 54449 |                 |                                                                                                                                                                                                                                                                          |
| rs951048    | 15 | 53094503 | a | t | 0.44 | -0.030 | 0.006 | 8.7E-07 | 0  | 54449 |                 |                                                                                                                                                                                                                                                                          |
| rs2414396   | 15 | 53094680 | a | g | 0.46 | -0.031 | 0.006 | 7.6E-07 | 0  | 54449 |                 |                                                                                                                                                                                                                                                                          |
| rs12907410  | 15 | 53095223 | t | c | 0.56 | 0.028  | 0.006 | 3.7E-06 | 0  | 54449 |                 |                                                                                                                                                                                                                                                                          |
| rs1728886   | 15 | 53095714 | t | c | 0.56 | 0.030  | 0.006 | 1.2E-06 | 0  | 54449 |                 |                                                                                                                                                                                                                                                                          |
| rs17818939  | 15 | 53096140 | a | g | 0.44 | -0.030 | 0.006 | 1.1E-06 | 0  | 54450 |                 |                                                                                                                                                                                                                                                                          |
| rs1728878   | 15 | 53097144 | t | c | 0.57 | 0.028  | 0.006 | 1.9E-06 | 0  | 54450 |                 |                                                                                                                                                                                                                                                                          |
| rs8042768   | 15 | 53097375 | a | g | 0.43 | -0.028 | 0.006 | 2.1E-06 | 0  | 54448 |                 |                                                                                                                                                                                                                                                                          |
| rs1690363   | 15 | 53098119 | a | g | 0.43 | -0.028 | 0.006 | 2.0E-06 | 0  | 54448 |                 |                                                                                                                                                                                                                                                                          |
| rs1690365   | 15 | 53098549 | t | c | 0.56 | 0.028  | 0.006 | 1.9E-06 | 0  | 54450 |                 |                                                                                                                                                                                                                                                                          |
| rs1614271   | 15 | 53098677 | t | c | 0.57 | 0.029  | 0.006 | 1.6E-06 | 0  | 54448 |                 |                                                                                                                                                                                                                                                                          |
| rs1690366   | 15 | 53098855 | t | g | 0.44 | -0.030 | 0.006 | 2.0E-06 | 0  | 54448 |                 |                                                                                                                                                                                                                                                                          |
| rs1690367   | 15 | 53099066 | a | g | 0.43 | -0.028 | 0.006 | 1.8E-06 | 0  | 54406 |                 |                                                                                                                                                                                                                                                                          |
| rs7180127   | 15 | 53103432 | t | c | 0.51 | 0.029  | 0.006 | 3.7E-06 | 0  | 54449 |                 |                                                                                                                                                                                                                                                                          |
| rs10083619  | 15 | 53106962 | a | g | 0.51 | 0.029  | 0.006 | 3.5E-06 | 0  | 54448 |                 |                                                                                                                                                                                                                                                                          |
| rs2899576   | 15 | 53107909 | t | c | 0.48 | -0.030 | 0.006 | 1.2E-06 | 0  | 54424 |                 |                                                                                                                                                                                                                                                                          |
| rs1528472   | 15 | 53108420 | a | c | 0.48 | -0.032 | 0.006 | 5.4E-07 | 0  | 54445 |                 |                                                                                                                                                                                                                                                                          |
| rs17238122  | 15 | 53109188 | a | g | 0.48 | -0.031 | 0.006 | 8.8E-07 | 0  | 54443 |                 |                                                                                                                                                                                                                                                                          |
| rs1528477   | 15 | 53111680 | a | g | 0.48 | -0.031 | 0.006 | 1.5E-06 | 0  | 54449 |                 |                                                                                                                                                                                                                                                                          |
| rs1830324   | 15 | 53112207 | a | g | 0.51 | -0.030 | 0.006 | 3.4E-06 | 0  | 54449 |                 |                                                                                                                                                                                                                                                                          |
| rs11858741  | 15 | 53112699 | a | g | 0.51 | 0.030  | 0.006 | 2.2E-06 | 0  | 54450 |                 |                                                                                                                                                                                                                                                                          |
| rs231226    | 19 | 40959617 | t | c | 0.62 | -0.033 | 0.007 | 5.1E-06 | 22 | 44877 | <i>ARHGAP33</i> | PROSER3(dist=7700),LINC01529(dist=12001),HSPB6(dist=19847),LIN37(dist=22357),PRODH2(dist=23115),PSENEN(dist=29721),U2AF1L4(dist=31434),IGFLR1(dist=34426),KMT2B(dist=37996),NPHS1(dist=48497),ZBTB32(dist=59837),KIRREL2(dist=80033),APLP1(dist=91624),UPK1A(dist=98390) |
| rs231227    | 19 | 40959907 | a | g | 0.38 | 0.033  | 0.007 | 4.9E-06 | 22 | 44877 | <i>ARHGAP33</i> | PROSER3(dist=7990),LINC01529(dist=11711),HSPB6(dist=20137),LIN37(dist=22647),PRODH2(dist=22825),PSENEN(dist=30011),U2AF1L4(dist=31724),IGFLR1(dist=34716),KMT2B(dist=38286),NPHS1(dist=48207),ZBTB32(dist=60127),KIRREL2(dist=79743),APLP1(dist=91334),UPK1A(dist=98680) |

## SUPPLEMENTARY DATA

|           |    |          |   |   |      |        |       |         |   |       |
|-----------|----|----------|---|---|------|--------|-------|---------|---|-------|
| rs2828785 | 21 | 24359376 | t | c | 0.27 | -0.038 | 0.008 | 7.9E-06 | 0 | 54450 |
|-----------|----|----------|---|---|------|--------|-------|---------|---|-------|

Standard error (SE) and p-values are corrected for genomic control. A1 is the coded allele.

\*The previously identified missense variant rs18012399 in *CUBN* is correlated with the index variant rs10795433 in this study ( $r^2=0.54$  and  $D'=1$ , based on HapMap r22 CEU data)

SUPPLEMENTARY DATA

Supplementary Table 5: SNPs associated with MA among all individuals with a p-value of <1E-05.

| SNPID      | chr | position (hg18) | Allele 1 | Allele 2 | Frequency Allele1 | Effect | SE    | p-value | I <sup>2</sup> % | Sample Size | In Gene       | Genes Within 100kb                                                                                                                                     |
|------------|-----|-----------------|----------|----------|-------------------|--------|-------|---------|------------------|-------------|---------------|--------------------------------------------------------------------------------------------------------------------------------------------------------|
| rs11579312 | 1   | 30429159        | t        | c        | 0.69              | 0.11   | 0.025 | 9.7E-06 | 0                | 54116       |               |                                                                                                                                                        |
| rs3795324  | 1   | 158909735       | a        | c        | 0.82              | -0.15  | 0.031 | 9.4E-07 | 22               | 52716       |               | CD48(dist=5425),SLAMF1(dist=26010),SLAMF7(dist=65736),CD84(dist=93805)                                                                                 |
| rs16827742 | 2   | 150615405       | a        | g        | 0.06              | 0.30   | 0.063 | 3.1E-06 | 12               | 35962       |               |                                                                                                                                                        |
| rs9333289  | 2   | 187206352       | t        | c        | 0.71              | -0.10  | 0.022 | 5.2E-06 | 0                | 54107       | ITGAV         | FAM171B(dist=60682)                                                                                                                                    |
| rs9333290  | 2   | 187227583       | t        | g        | 0.29              | 0.11   | 0.023 | 5.0E-06 | 0                | 54107       | ITGAV         | FAM171B(dist=39451)                                                                                                                                    |
| rs13006483 | 2   | 187230995       | t        | g        | 0.29              | 0.10   | 0.023 | 7.0E-06 | 0                | 54107       | ITGAV         | FAM171B(dist=36039)                                                                                                                                    |
| rs12151442 | 2   | 187246092       | t        | c        | 0.70              | -0.10  | 0.022 | 2.0E-06 | 0                | 54107       | ITGAV         | FAM171B(dist=20942)                                                                                                                                    |
| rs13001028 | 2   | 187255140       | a        | g        | 0.70              | -0.10  | 0.023 | 8.3E-06 | 0                | 54106       |               | ITGAV(dist=1266),FAM171B(dist=11894)                                                                                                                   |
| rs13028817 | 2   | 187255744       | t        | g        | 0.70              | -0.10  | 0.022 | 2.1E-06 | 0                | 54105       |               | ITGAV(dist=1870),FAM171B(dist=11290)                                                                                                                   |
| rs12615659 | 2   | 187259552       | a        | t        | 0.30              | 0.11   | 0.022 | 1.3E-06 | 0                | 54105       |               | ITGAV(dist=5678),FAM171B(dist=7482)                                                                                                                    |
| rs11678190 | 2   | 187268553       | a        | c        | 0.70              | -0.10  | 0.023 | 5.1E-06 | 0                | 54107       | FAM171B       | ITGAV(dist=14679)                                                                                                                                      |
| rs17750683 | 2   | 187328542       | a        | t        | 0.68              | -0.11  | 0.022 | 1.4E-06 | 0                | 54105       | FAM171B       | ZSWIM2(dist=71910),ITGAV(dist=74668)                                                                                                                   |
| rs13026081 | 2   | 187334583       | t        | c        | 0.32              | 0.11   | 0.022 | 1.6E-06 | 0                | 54093       | FAM171B       | ZSWIM2(dist=65869),ITGAV(dist=80709)                                                                                                                   |
| rs1077216  | 3   | 46867165        | t        | c        | 0.07              | 0.20   | 0.044 | 5.2E-06 | 5                | 45096       |               | MYL3(dist=7196),PRSS42(dist=16576),PTH1R(dist=27075),CCDC12(dist=71059)                                                                                |
| rs13160548 | 5   | 38814607        | t        | c        | 0.69              | -0.10  | 0.023 | 8.2E-06 | 14               | 53130       | OSMR-AS1      | LINC01265(dist=58475),OSMR(dist=67110)                                                                                                                 |
| rs12719264 | 5   | 119211839       | a        | g        | 0.30              | -0.11  | 0.025 | 6.2E-06 | 29               | 54115       |               |                                                                                                                                                        |
| rs2110904  | 6   | 107701464       | t        | c        | 0.65              | 0.10   | 0.022 | 8.9E-06 | 0                | 54116       | PDSS2         |                                                                                                                                                        |
| rs538641   | 8   | 103072879       | a        | g        | 0.05              | 0.28   | 0.062 | 7.8E-06 | 0                | 50048       | NCALD         |                                                                                                                                                        |
| rs1801239  | 10  | 16959058        | t        | c        | 0.90              | -0.23  | 0.035 | 1.7E-10 | 18               | 54115       | CUBN          | RSU1(dist=59599)                                                                                                                                       |
| rs17343073 | 10  | 16972202        | a        | t        | 0.90              | -0.23  | 0.036 | 3.0E-10 | 0                | 54115       | CUBN          | RSU1(dist=72743)                                                                                                                                       |
| rs6602163  | 10  | 17006772        | a        | g        | 0.83              | -0.17  | 0.029 | 1.5E-09 | 5                | 54116       | CUBN          |                                                                                                                                                        |
| rs10795433 | 10  | 17009929        | a        | c        | 0.85              | -0.20  | 0.031 | 1.3E-10 | 4                | 54116       | CUBN          |                                                                                                                                                        |
| rs12764441 | 10  | 72361657        | t        | c        | 0.48              | -0.10  | 0.021 | 3.5E-06 | 0                | 54116       |               | PCBD1(dist=43108),SGPL1(dist=50719)                                                                                                                    |
| rs3740393  | 10  | 104626645       | c        | g        | 0.21              | 0.13   | 0.028 | 6.1E-06 | 19               | 54048       | C10orf32-ASMT | C10orf32(dist=11937),CYP17A1(dist=39365),CNNM2(dist=41420),WBP1L(dist=60634)                                                                           |
| rs10899033 | 11  | 74070819        | c        | g        | 0.72              | 0.11   | 0.025 | 9.3E-06 | 0                | 54116       |               | CHRD12(dist=14303),MIR4696(dist=38142),POLD3(dist=39066),RNF169(dist=66742)                                                                            |
| rs10498273 | 14  | 20214639        | c        | g        | 0.94              | -0.21  | 0.047 | 9.6E-06 | 36               | 53131       |               | ANG(dist=7537),RNASE4(dist=7573),OR6S1(dist=34949),EDDM3A(dist=69300),LOC254028(dist=69419),RNASE12(dist=85817),RNASE11(dist=86382),EDDM3B(dist=91787) |
| rs7145202  | 14  | 22161945        | t        | c        | 0.62              | 0.10   | 0.022 | 3.7E-06 | 0                | 54106       |               | ABHD4(dist=10840),DAD1(dist=33962)                                                                                                                     |
| rs6572602  | 14  | 22163380        | a        | g        | 0.62              | 0.11   | 0.024 | 4.6E-06 | 0                | 41412       |               | ABHD4(dist=12275),DAD1(dist=35397)                                                                                                                     |
| rs274173   | 19  | 61384255        | c        | g        | 0.17              | -0.23  | 0.051 | 5.2E-06 | 12               | 38796       | GALP          | ZSCAN5B(dist=8615),ZNF444(dist=20181),ZSCAN5A(dist=40236),ZNF787(dist=59701)                                                                           |

## SUPPLEMENTARY DATA

|           |    |          |   |   |      |       |       |         |    |       |              |
|-----------|----|----------|---|---|------|-------|-------|---------|----|-------|--------------|
| rs6030216 | 20 | 40486448 | t | c | 0.17 | 0.12  | 0.027 | 6.0E-06 | 0  | 54115 | <i>PTPRT</i> |
| rs4812598 | 20 | 40487956 | c | g | 0.83 | -0.12 | 0.027 | 9.1E-06 | 0  | 54115 | <i>PTPRT</i> |
| rs6513791 | 20 | 40491536 | t | c | 0.18 | 0.12  | 0.026 | 4.4E-06 | 12 | 54115 | <i>PTPRT</i> |
| rs4810356 | 20 | 40491604 | t | c | 0.82 | -0.13 | 0.028 | 7.6E-06 | 11 | 54115 | <i>PTPRT</i> |
| rs6030232 | 20 | 40496297 | a | t | 0.82 | -0.12 | 0.027 | 8.7E-06 | 0  | 54115 | <i>PTPRT</i> |
| rs6030238 | 20 | 40498930 | a | g | 0.81 | -0.12 | 0.026 | 6.0E-06 | 12 | 54115 | <i>PTPRT</i> |

Odds ratios can be obtained by exponentiating the effect to the basis *e*.

SUPPLEMENTARY DATA

**Supplementary Table 6: SNPs associated with UACR among individuals without diabetes with a p-value of <1E-05.**

| SNPID      | chr | position (hg18) | Allele 1 | Allele 2 | Frequency Allele1 | Effect | SE    | p-value | I <sup>2</sup> % | Sample Size | In Gene        | Genes Within 100kb                                                                                                                                                                                                                                                            |
|------------|-----|-----------------|----------|----------|-------------------|--------|-------|---------|------------------|-------------|----------------|-------------------------------------------------------------------------------------------------------------------------------------------------------------------------------------------------------------------------------------------------------------------------------|
| rs17377079 | 1   | 84999401        | a        | g        | 0.15              | 0.060  | 0.013 | 6.9E-06 | 9                | 46061       |                | LPAR3(dist=52273),SSX2IP(dist=70573)                                                                                                                                                                                                                                          |
| rs4072037  | 1   | 153428691       | t        | c        | 0.54              | 0.028  | 0.006 | 8.5E-06 | 0                | 46061       | <i>MUC1</i>    | MIR92B(dist=2901),THBS3(dist=3312),TRIM46(dist=4620),KRTC AP2(dist=16263),MTX1(dist=16423),GBAP1(dist=21549),GBA(dist=42172),DPM3(dist=49071),SLC50A1(dist=50733),EFNA1(dist=54681),FAM189B(dist=54929),SCAMP3(dist=63703),CLK2(dist=70592),HCN3(dist=85151),PKLR(dist=97017) |
| rs9333290  | 2   | 187227583       | t        | g        | 0.30              | 0.037  | 0.008 | 4.1E-06 | 3                | 46052       | <i>ITGAV</i>   | FAM171B(dist=39451)                                                                                                                                                                                                                                                           |
| rs13006483 | 2   | 187230995       | t        | g        | 0.30              | 0.035  | 0.008 | 6.7E-06 | 3                | 46052       | <i>ITGAV</i>   | FAM171B(dist=36039)                                                                                                                                                                                                                                                           |
| rs13001028 | 2   | 187255140       | a        | g        | 0.69              | -0.034 | 0.008 | 9.9E-06 | 0                | 46052       |                | ITGAV(dist=1266),FAM171B(dist=11894)                                                                                                                                                                                                                                          |
| rs11678190 | 2   | 187268553       | a        | c        | 0.69              | -0.035 | 0.008 | 8.7E-06 | 0                | 46052       | <i>FAM171B</i> | ITGAV(dist=14679)                                                                                                                                                                                                                                                             |
| rs17750683 | 2   | 187328542       | a        | t        | 0.68              | -0.035 | 0.008 | 4.6E-06 | 0                | 46052       | <i>FAM171B</i> | ZSWIM2(dist=71910),ITGAV(dist=74668)                                                                                                                                                                                                                                          |
| rs13026081 | 2   | 187334583       | t        | c        | 0.32              | 0.034  | 0.008 | 8.3E-06 | 0                | 46045       | <i>FAM171B</i> | ZSWIM2(dist=65869),ITGAV(dist=80709)                                                                                                                                                                                                                                          |
| rs4674086  | 2   | 201032130       | t        | c        | 0.46              | 0.028  | 0.006 | 8.7E-06 | 0                | 45053       | <i>SPATS2L</i> | KCTD18(dist=29799),SGOL2(dist=66980)                                                                                                                                                                                                                                          |
| rs9372871  | 6   | 127849645       | t        | c        | 0.89              | -0.046 | 0.010 | 4.2E-06 | 2                | 45094       | <i>SOGA3</i>   | KIAA0408(dist=27417),C6orf58(dist=90367)                                                                                                                                                                                                                                      |
| rs9372872  | 6   | 127849848       | c        | g        | 0.11              | 0.046  | 0.010 | 2.5E-06 | 0                | 46061       | <i>SOGA3</i>   | KIAA0408(dist=27620),C6orf58(dist=90164)                                                                                                                                                                                                                                      |
| rs7739650  | 6   | 127850605       | a        | g        | 0.11              | 0.046  | 0.010 | 3.1E-06 | 2                | 46061       | <i>SOGA3</i>   | KIAA0408(dist=28377),C6orf58(dist=89407)                                                                                                                                                                                                                                      |
| rs13220247 | 6   | 127850652       | t        | c        | 0.89              | -0.046 | 0.010 | 3.4E-06 | 2                | 46061       | <i>SOGA3</i>   | KIAA0408(dist=28424),C6orf58(dist=89360)                                                                                                                                                                                                                                      |
| rs9388580  | 6   | 127851073       | t        | c        | 0.89              | -0.044 | 0.010 | 8.7E-06 | 6                | 46061       | <i>SOGA3</i>   | KIAA0408(dist=28845),C6orf58(dist=88939)                                                                                                                                                                                                                                      |
| rs12668467 | 7   | 13598753        | t        | c        | 0.27              | -0.043 | 0.009 | 4.1E-06 | 0                | 46061       |                |                                                                                                                                                                                                                                                                               |
| rs1801239  | 10  | 16959058        | t        | c        | 0.90              | -0.054 | 0.012 | 4.4E-06 | 25               | 46061       | <i>CUBN</i>    | RSU1(dist=59599)                                                                                                                                                                                                                                                              |
| rs10795433 | 10  | 17009929        | a        | c        | 0.86              | -0.045 | 0.010 | 8.7E-06 | 14               | 46061       | <i>CUBN</i>    |                                                                                                                                                                                                                                                                               |
| rs2192224  | 15  | 24959369        | t        | g        | 0.13              | 0.048  | 0.011 | 6.1E-06 | 0                | 46061       | <i>GABRG3</i>  | LOC101928869(dist=26259)                                                                                                                                                                                                                                                      |
| rs7173577  | 15  | 53092295        | a        | g        | 0.45              | -0.029 | 0.006 | 6.7E-06 | 0                | 46061       |                |                                                                                                                                                                                                                                                                               |
| rs1728867  | 15  | 53094106        | a        | g        | 0.45              | -0.028 | 0.006 | 7.4E-06 | 0                | 46061       |                |                                                                                                                                                                                                                                                                               |
| rs951048   | 15  | 53094503        | a        | t        | 0.44              | -0.028 | 0.006 | 7.8E-06 | 0                | 46061       |                |                                                                                                                                                                                                                                                                               |
| rs2414396  | 15  | 53094680        | a        | g        | 0.46              | -0.029 | 0.006 | 4.1E-06 | 0                | 46061       |                |                                                                                                                                                                                                                                                                               |
| rs17818939 | 15  | 53096140        | a        | g        | 0.44              | -0.028 | 0.006 | 9.9E-06 | 0                | 46061       |                |                                                                                                                                                                                                                                                                               |
| rs2899576  | 15  | 53107909        | t        | c        | 0.48              | -0.029 | 0.006 | 5.7E-06 | 0                | 46035       |                |                                                                                                                                                                                                                                                                               |
| rs1528472  | 15  | 53108420        | a        | c        | 0.48              | -0.030 | 0.007 | 3.1E-06 | 0                | 46056       |                |                                                                                                                                                                                                                                                                               |
| rs17238122 | 15  | 53109188        | a        | g        | 0.48              | -0.030 | 0.007 | 4.8E-06 | 0                | 46054       |                |                                                                                                                                                                                                                                                                               |
| rs1528477  | 15  | 53111680        | a        | g        | 0.48              | -0.030 | 0.007 | 6.6E-06 | 0                | 46061       |                |                                                                                                                                                                                                                                                                               |
| rs11858741 | 15  | 53112699        | a        | g        | 0.51              | 0.029  | 0.007 | 7.9E-06 | 0                | 46061       |                |                                                                                                                                                                                                                                                                               |
| rs4528660  | 18  | 3033516         | t        | c        | 0.91              | -0.073 | 0.017 | 9.4E-06 | 3                | 33478       |                | MYOM1(dist=23289),LPIN2(dist=31571),LOC727896 (dist=96895)                                                                                                                                                                                                                    |



SUPPLEMENTARY DATA

Supplementary Table 7: SNPs associated with UACR among individuals with diabetes with a p-value of <1E-05.

| SNPID      | chr | position (hg18) | Allele 1 | Allele 2 | Frequency Allele1 | Effect | SE    | p-value | I <sup>2</sup> % | Sample Size | In Gene       | Genes Within 100kb [Closest Gene]       |
|------------|-----|-----------------|----------|----------|-------------------|--------|-------|---------|------------------|-------------|---------------|-----------------------------------------|
| rs13427836 | 2   | 128744431       | t        | c        | 0.14              | 0.199  | 0.044 | 6.1E-06 | 10               | 5509        | <i>HS6ST1</i> | UGGT1(dist=74712)                       |
| rs13428208 | 2   | 128744772       | t        | c        | 0.14              | 0.195  | 0.044 | 7.6E-06 | 10               | 5509        | <i>HS6ST1</i> | UGGT1(dist=75053)                       |
| rs2405747  | 2   | 128748295       | t        | c        | 0.15              | 0.193  | 0.043 | 6.9E-06 | 14               | 5509        | <i>HS6ST1</i> | UGGT1(dist=78576)                       |
| rs4662787  | 2   | 128752447       | t        | c        | 0.18              | 0.176  | 0.040 | 9.0E-06 | 0                | 5824        | <i>HS6ST1</i> | UGGT1(dist=82728)                       |
| rs10183821 | 2   | 128753139       | a        | g        | 0.81              | -0.169 | 0.038 | 9.3E-06 | 0                | 5825        | <i>HS6ST1</i> | UGGT1(dist=83420)                       |
| rs13079877 | 3   | 2102845         | a        | g        | 0.45              | 0.148  | 0.033 | 5.6E-06 | 25               | 5825        |               | CNTN4(dist=12705),CNTN4-AS2(dist=24248) |
| rs7634770  | 3   | 67012918        | a        | c        | 0.70              | -0.142 | 0.030 | 2.7E-06 | 19               | 5825        |               | [KBTBD8, dist=119174]                   |
| rs9876318  | 3   | 67014118        | a        | t        | 0.69              | -0.144 | 0.030 | 2.0E-06 | 20               | 5824        |               | [KBTBD8, dist=117974]                   |
| rs17738155 | 6   | 51264035        | t        | c        | 0.92              | -0.241 | 0.053 | 5.9E-06 | 39               | 5825        |               | [PKHD1, dist=324068]                    |
| rs947724   | 6   | 51274689        | t        | c        | 0.92              | -0.239 | 0.053 | 7.5E-06 | 41               | 5825        |               | [PKHD1, dist=313414]                    |
| rs7792461  | 7   | 29479920        | t        | g        | 0.39              | 0.130  | 0.029 | 5.1E-06 | 0                | 5825        | <i>CHN2</i>   | PRR15(dist=90032)                       |
| rs4722909  | 7   | 29481456        | a        | g        | 0.60              | -0.134 | 0.029 | 3.2E-06 | 0                | 5823        | <i>CHN2</i>   | PRR15(dist=88496)                       |
| rs4722913  | 7   | 29482735        | a        | g        | 0.61              | -0.131 | 0.029 | 4.2E-06 | 0                | 5825        | <i>CHN2</i>   | PRR15(dist=87217)                       |
| rs7798161  | 7   | 29483162        | a        | g        | 0.61              | -0.130 | 0.029 | 4.7E-06 | 0                | 5825        | <i>CHN2</i>   | PRR15(dist=86790)                       |
| rs3828977  | 7   | 29486023        | a        | g        | 0.59              | -0.131 | 0.029 | 4.9E-06 | 0                | 5825        | <i>CHN2</i>   | PRR15(dist=83929)                       |
| rs7922045  | 10  | 122991722       | t        | c        | 0.26              | 0.165  | 0.033 | 5.7E-07 | 0                | 5824        |               | [FGFR2, dist=236111]                    |
| rs729014   | 10  | 122992796       | t        | c        | 0.15              | 0.202  | 0.043 | 2.4E-06 | 0                | 5825        |               | [FGFR2, dist=235037]                    |
| rs649529   | 11  | 87647899        | t        | g        | 0.43              | -0.147 | 0.033 | 9.3E-06 | 0                | 5825        |               | CTSC(dist=18509),RAB38(dist=99616)      |

SUPPLEMENTARY DATA

**Supplementary Table 8: Discovery, replication and combined estimates for all index SNPs associated with UACR in diabetes in the discovery sample at  $p < 1E-05$**

| Marker     | gene nearby   | chr | position (hg18) | A A<br>1 2 | discovery  |       |      |         |                  |      | replication |       |      |          |                  |      | combined   |       |      |          |                  |      |
|------------|---------------|-----|-----------------|------------|------------|-------|------|---------|------------------|------|-------------|-------|------|----------|------------------|------|------------|-------|------|----------|------------------|------|
|            |               |     |                 |            | Freq<br>A1 | beta  | SE   | p-value | I <sup>2</sup> % | n    | Freq<br>A1  | beta  | SE   | p-value  | I <sup>2</sup> % | n    | Freq<br>A1 | beta  | SE   | p-value  | I <sup>2</sup> % | n    |
| rs13427836 | <i>HS6ST1</i> | 2   | 128744431       | t c        | 0.14       | 0.20  | 0.04 | 6.1E-06 | 10               | 5509 | 0.15        | 0.16  | 0.07 | 3.13E-02 | 58               | 1890 | 0.15       | 0.19  | 0.04 | 6.31E-07 | 30               | 7399 |
| rs13079877 | <i>CNTN4</i>  | 3   | 2102845         | a g        | 0.45       | 0.15  | 0.03 | 5.6E-06 | 25               | 5825 | 0.50        | 0.04  | 0.05 | 5.16E-01 | 0                | 1880 | 0.46       | 0.12  | 0.03 | 2.40E-05 | 20               | 7705 |
| rs9876318  | <i>KBTD8</i>  | 3   | 67014118        | a t        | 0.69       | -0.14 | 0.03 | 2.0E-06 | 20               | 5824 | 0.69        | 0.08  | 0.06 | 1.56E-01 | 0                | 1897 | 0.69       | -0.09 | 0.03 | 4.86E-04 | 37               | 7721 |
| rs17738155 | <i>PKHD1</i>  | 6   | 51264035        | t c        | 0.92       | -0.24 | 0.05 | 5.9E-06 | 39               | 5825 | 0.92        | 0.06  | 0.10 | 5.30E-01 | 0                | 1896 | 0.92       | -0.17 | 0.05 | 2.51E-04 | 42               | 7721 |
| rs4722909  | <i>CHN2</i>   | 7   | 29481456        | a g        | 0.60       | -0.13 | 0.03 | 3.2E-06 | 0                | 5823 | 0.60        | 0.09  | 0.05 | 9.66E-02 | 40               | 1894 | 0.60       | -0.08 | 0.03 | 9.92E-04 | 38               | 7717 |
| rs7922045  | <i>FGFR2</i>  | 10  | 122991722       | t c        | 0.26       | 0.17  | 0.03 | 5.7E-07 | 0                | 5824 | 0.23        | -0.10 | 0.06 | 1.05E-01 | 35               | 1824 | 0.25       | 0.11  | 0.03 | 2.41E-04 | 39               | 7648 |
| rs649529   | <i>RAB38</i>  | 11  | 87647899        | t g        | 0.43       | -0.15 | 0.03 | 9.3E-06 | 0                | 5825 | 0.43        | -0.12 | 0.05 | 1.91E-02 | 0                | 1962 | 0.43       | -0.14 | 0.03 | 5.84E-07 | 0                | 7787 |

A1 is the coded allele (effect allele), i.e. the beta corresponds to the effect by which UACR changes per each additional copy of the coded allele.

The I<sup>2</sup> statistic of the combined results was obtained from a separate analysis incorporating each discovery file with single GC-correction and the replication files. Standard error (SE) and p-value of the combined results are based on double-GC corrected results as described in the methods.

**Supplementary Table 9: Association results for the index SNPs near *RAB38/CTSC* and in *HS6ST1* in the DCCT/EDIC Study**

| <b>incident microalbuminuria (1244 individuals [268 cases]; primary endpoint)</b>          |               |                            |        |      |         |
|--------------------------------------------------------------------------------------------|---------------|----------------------------|--------|------|---------|
| SNP                                                                                        | effect allele | frequency of effect allele | effect | se   | p-value |
| rs649529                                                                                   | T             | 0.42                       | 0.04   | 0.09 | 0.64    |
| rs13427836                                                                                 | T             | 0.14                       | -0.18  | 0.14 | 0.20    |
|                                                                                            |               |                            |        |      |         |
| <b>time to macroalbuminuria or ESRD (1304 individuals [133 cases]; secondary endpoint)</b> |               |                            |        |      |         |
| SNP                                                                                        | effect allele | frequency of effect allele | effect | se   | p-value |
| rs649529                                                                                   | T             | 0.42                       | 0.24   | 0.14 | 0.09    |
| rs13427836                                                                                 | T             | 0.14                       | -0.31  | 0.22 | 0.16    |

Cox proportional hazards regression models were used to estimate hazard ratios after adjustment for cohort status (primary vs. secondary), treatment (intensive vs. conventional), cohort\*treatment interaction (stratified by DCCT year of entry), age of diagnosis squared, sex, diabetes duration squared, body mass index, blood pressure, triglyceride, HDL-C, total cholesterol, smoking (all at baseline), as well as time-dependent updated mean A1C, and time-dependent indicators for hypertension diagnosis and treatment. Imputation quality (rs13427836) and call rate (rs649529) were both  $\geq 0.99$ .
